# Supplementary material for: Are better existing WASH practices in urban slums associated with a lower long-term risk of severe cholera? A prospective cohort study with 4 years of follow-up in Mirpur, Bangladesh
Source: PubMed Central journal article supplement (PMC9494564; doi:10.1136/bmjopen-2022-060858), 2022-09-21
Supplement: bmjopen-2022-060858.draft_revisions.pdf [file bmjopen-2022-060858.draft_revisions.pdf]

# BMJ Open

BMJ Open is committed to open peer review. As part of this commitment we make the peer review history of every article we publish publicly available.

When an article is published we post the peer reviewers' comments and the authors' responses online. We also post the versions of the paper that were used during peer review. These are the versions that the peer review comments apply to.

The versions of the paper that follow are the versions that were submitted during the peer review process. They are not the versions of record or the final published versions. They should not be cited or distributed as the published version of this manuscript.

BMJ Open is an open access journal and the full, final, typeset and author-corrected version of record of the manuscript is available on our site with no access controls, subscription charges or pay-per-view fees (<http://bmjopen.bmj.com>).

If you have any questions on BMJ Open's open peer review process please email [info.bmjopen@bmj.com](mailto:info.bmjopen@bmj.com)

# BMJ Open

## Addressing endemic cholera with improved WASH in urban slums: a prospective cohort study

|                               |                                                                                                                                                                                                                                                                                                                                                                                                                                                                                                                                                                                                                                                                                                                                                                                                                                                                                                                                                                                                                                                                                                                                                                                                                                                                                                                                                                                                                                                                                                                                                                                                                                                                                                                                                                                                                                                                                                                        |
|-------------------------------|------------------------------------------------------------------------------------------------------------------------------------------------------------------------------------------------------------------------------------------------------------------------------------------------------------------------------------------------------------------------------------------------------------------------------------------------------------------------------------------------------------------------------------------------------------------------------------------------------------------------------------------------------------------------------------------------------------------------------------------------------------------------------------------------------------------------------------------------------------------------------------------------------------------------------------------------------------------------------------------------------------------------------------------------------------------------------------------------------------------------------------------------------------------------------------------------------------------------------------------------------------------------------------------------------------------------------------------------------------------------------------------------------------------------------------------------------------------------------------------------------------------------------------------------------------------------------------------------------------------------------------------------------------------------------------------------------------------------------------------------------------------------------------------------------------------------------------------------------------------------------------------------------------------------|
| Journal:                      | <i>BMJ Open</i>                                                                                                                                                                                                                                                                                                                                                                                                                                                                                                                                                                                                                                                                                                                                                                                                                                                                                                                                                                                                                                                                                                                                                                                                                                                                                                                                                                                                                                                                                                                                                                                                                                                                                                                                                                                                                                                                                                        |
| Manuscript ID                 | bmjopen-2022-060858                                                                                                                                                                                                                                                                                                                                                                                                                                                                                                                                                                                                                                                                                                                                                                                                                                                                                                                                                                                                                                                                                                                                                                                                                                                                                                                                                                                                                                                                                                                                                                                                                                                                                                                                                                                                                                                                                                    |
| Article Type:                 | Original research                                                                                                                                                                                                                                                                                                                                                                                                                                                                                                                                                                                                                                                                                                                                                                                                                                                                                                                                                                                                                                                                                                                                                                                                                                                                                                                                                                                                                                                                                                                                                                                                                                                                                                                                                                                                                                                                                                      |
| Date Submitted by the Author: | 24-Feb-2022                                                                                                                                                                                                                                                                                                                                                                                                                                                                                                                                                                                                                                                                                                                                                                                                                                                                                                                                                                                                                                                                                                                                                                                                                                                                                                                                                                                                                                                                                                                                                                                                                                                                                                                                                                                                                                                                                                            |
| Complete List of Authors:     | <p>Kang, Sophie; International Vaccine Institute, Epidemiology, Public Health, and Impact Unit<br/> Chowdhury, Fahima; International Centre for Diarrhoeal Disease Research Bangladesh; Griffith University Menzies Health Institute Queensland<br/> Park, Juyeon; International Vaccine Institute, Epidemiology, Public Health, and Impact Unit; University of Cambridge, Department of Medicine<br/> Ahmed, Tasnuva; International Centre for Diarrhoeal Disease Research Bangladesh<br/> Tadesse, Birkneh Tilahun; International Vaccine Institute, Epidemiology, Public Health, and Impact Unit<br/> Islam, Md. Taufiqul; International Centre for Diarrhoeal Disease Research Bangladesh<br/> Kim, Deok Ryun; International Vaccine Institute, Epidemiology, Public Health, and Impact Unit<br/> Im, Justin; International Vaccine Institute<br/> Aziz, Asma; International Vaccine Institute, Epidemiology, Public Health, and Impact Unit<br/> Hoque, Masuma; International Centre for Diarrhoeal Disease Research Bangladesh<br/> Pak, GiDeok; International Vaccine Institute<br/> Khanam, Farhana; International Centre for Diarrhoeal Disease Research Bangladesh<br/> Ahmmed, Faisal; International Centre for Diarrhoeal Disease Research Bangladesh<br/> Liu , Xinxue ; University of Oxford Oxford Vaccine Group<br/> Zaman, K; International Centre for Diarrhoeal Disease Research Bangladesh<br/> Khan, Ashraful Islam; International Centre for Diarrhoeal Disease Research<br/> Kim, Jerome ; International Vaccine Institute<br/> Marks, Florian ; International Vaccine Institute; University of Cambridge, Department of Medicine<br/> Qadri, Firdausi ; International Centre for Diarrhoeal Disease Research Bangladesh<br/> Clemens, John; International Vaccine Institute, Epidemiology, Public Health, and Impact Unit; International Centre for Diarrhoeal Disease Research Bangladesh</p> |
| Keywords:                     | EPIDEMIOLOGY, Epidemiology < INFECTIOUS DISEASES, INFECTIOUS                                                                                                                                                                                                                                                                                                                                                                                                                                                                                                                                                                                                                                                                                                                                                                                                                                                                                                                                                                                                                                                                                                                                                                                                                                                                                                                                                                                                                                                                                                                                                                                                                                                                                                                                                                                                                                                           |

1  
2  
3  
4  
5  
6  
7  
8  
9  
10  
11  
12  
13  
14  
15  
16  
17  
18  
19  
20  
21  
22  
23  
24  
25  
26  
27  
28  
29  
30  
31  
32  
33  
34  
35  
36  
37  
38  
39  
40  
41  
42  
43  
44  
45  
46  
47  
48  
49  
50  
51  
52  
53  
54  
55  
56  
57  
58  
59  
60

|  |                         |
|--|-------------------------|
|  | DISEASES, PUBLIC HEALTH |
|  |                         |

SCHOLARONE™  
Manuscripts

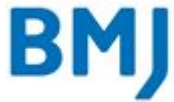

I, the Submitting Author has the right to grant and does grant on behalf of all authors of the Work (as defined in the below author licence), an exclusive licence and/or a non-exclusive licence for contributions from authors who are: i) UK Crown employees; ii) where BMJ has agreed a CC-BY licence shall apply, and/or iii) in accordance with the terms applicable for US Federal Government officers or employees acting as part of their official duties; on a worldwide, perpetual, irrevocable, royalty-free basis to BMJ Publishing Group Ltd ("BMJ") its licensees and where the relevant Journal is co-owned by BMJ to the co-owners of the Journal, to publish the Work in this journal and any other BMJ products and to exploit all rights, as set out in our [licence](#).

The Submitting Author accepts and understands that any supply made under these terms is made by BMJ to the Submitting Author unless you are acting as an employee on behalf of your employer or a postgraduate student of an affiliated institution which is paying any applicable article publishing charge ("APC") for Open Access articles. Where the Submitting Author wishes to make the Work available on an Open Access basis (and intends to pay the relevant APC), the terms of reuse of such Open Access shall be governed by a Creative Commons licence – details of these licences and which [Creative Commons](#) licence will apply to this Work are set out in our licence referred to above.

Other than as permitted in any relevant BMJ Author's Self Archiving Policies, I confirm this Work has not been accepted for publication elsewhere, is not being considered for publication elsewhere and does not duplicate material already published. I confirm all authors consent to publication of this Work and authorise the granting of this licence.

## Addressing endemic cholera with improved WASH in urban slums: a prospective cohort study

Sophie Kang<sup>1\*</sup>, Fahima Chowdhury<sup>2,7\*</sup>, Juyeon Park<sup>1,4\*</sup>, Tasnuva Ahmed<sup>2</sup>, Birkneh Tilahun Tadesse<sup>1</sup>, Md. Taufiqul Islam<sup>2</sup>, Deok Ryun Kim<sup>1</sup>, Justin Im<sup>1</sup>, Asma Binte Aziz<sup>1</sup>, Masuma Hoque<sup>2</sup>, Gideok Pak<sup>1</sup>, Farhana Khanam<sup>2</sup>, Faisal Ahmmed<sup>2</sup>, Xinxue Liu<sup>3</sup>, Khalequ Zaman<sup>2</sup>, Ashrafal Islam Khan<sup>2</sup>, Jerome H. Kim<sup>1</sup>, Florian Marks<sup>1,4,5</sup>, Firdausi Qadri<sup>2</sup>, John D. Clemens<sup>1,2,6</sup>

1 International Vaccine Institute, Seoul, Republic of Korea

2 International Centre for Diarrheal Disease Research, Bangladesh, Dhaka, Bangladesh

3 Oxford Vaccine Group, Department of Pediatrics, University of Oxford, Oxford OX3 9DU, UK

4 Department of Medicine, University of Cambridge, Cambridge, United Kingdom

5 University of Antananarivo, Antananarivo, Madagascar

6 UCLA Fielding School of Public Health, Los Angeles, CA 90095-1772, USA

7 Menzies Health Institute Queensland, Griffith University, Gold Coast, Australia

\* Contributed equally

Correspondence to Sophie Kang, International Vaccine Institute; Sophie.kang@ivi.int

## Abstract

### Objectives

To investigate the association between existing household WASH practices and severe cholera risk in a dense urban slum where cholera is highly endemic.

### Design, Setting, and Participants

We assembled a large prospective cohort within a cluster randomized trial evaluating the effectiveness of oral cholera vaccine. Our dynamic cohort population (n=193,576) was composed of individuals living in the “non-intervention” clusters of the trial, and were followed over four years. This study was conducted in a dense urban slum community of Dhaka, Bangladesh and cholera surveillance was active in twelve hospitals serving the study area.

### Primary outcome measure

First severe cholera episode detected during follow-up period.

### Results

The “Better” WASH decision tree found that water quality and access were the most significant factors associated with severe cholera risk. Members of “Better” WASH households, constituting one third of the total population, had a 47% reduced risk of severe cholera (95% CI: 29-69; p-value <0.001), after adjusting for covariates. The protective association between living in a “Better” WASH household and severe cholera persisted in all age groups.

### Conclusions

These findings suggest that salutary WASH practices can significantly reduce long-term risk of severe cholera even in highly endemic areas, and future interventions should look to these culturally acceptable WASH practices when designing sustainable cholera programs.

### Strengths and limitations of this study

- We followed the cohort under study for four years, making this analysis one of the longest uninterrupted evaluations of the relationship between household WASH and endemic cholera.
- The multivariable WASH prediction rule was validated using a separate sub-population and thus avoided overfitting to the training set.
- Household WASH factors were only evaluated once, either at baseline or when participants entered the study area, and this status applied to the entire follow-up period
- The household WASH variables included in this study were collected in the context of an OCV trial and not optimized for describing WASH factors independently

1  
2  
3  
4  
5  
6  
7  
8  
9  
10  
11  
12  
13  
14  
15  
16  
17  
18  
19  
20  
21  
22  
23  
24  
25  
26  
27  
28  
29  
30  
31  
32  
33  
34  
35  
36  
37  
38  
39  
40  
41  
42  
43  
44  
45  
46  
47  
48  
49  
50  
51  
52  
53  
54  
55  
56  
57  
58  
59  
60

For peer review only

## Introduction

The developing world has seen a rapid expansion of urban areas due, in part, to influxes into squalid urban slums. With an estimated 55% of the world's population living in urban areas, 1-in-3 of those urban dwellers live in slum households.<sup>1</sup> Slum households are defined as those which lack one or more of the following conditions: access to improved water, access to improved sanitation, sufficient living area, and durability of housing.



1  
2  
3  
4 In Bangladesh urban dwellers currently account for 38% of the population and are  
5 expected to exceed 50% by 2030; furthermore, 47% of the urban population lives in slums,  
6 where residents are at increased risk for waterborne diseases, including cholera<sup>2,3</sup>.

7  
8  
9 Cholera is a major cause of morbidity and mortality in Bangladesh.<sup>4</sup> Previously thought  
10 to be a rural disease in Bangladesh, cholera is now becoming a disease of cities and slums where  
11 living conditions create different challenges for cholera control from those encountered in rural  
12 settings.<sup>5</sup> Lessons learned from rural areas, and particularly in epidemic situations, may not be  
13 applicable to the changing pattern of cholera endemicity in urban areas. Specific studies on how  
14 endemic cholera can be controlled in these urban slums are needed.

15  
16  
17 Exacerbating the urban cholera situation further is the role of climate change. Rising  
18 temperatures and increased precipitation associated with climate change are significant  
19 predictors of cholera incidence, with strong evidence in studies of Bangladesh where warmer,  
20 wetter conditions are associated with major cholera outbreaks.<sup>6</sup> Climate change effects in urban  
21 areas have added negative implications for water quality, and studies have found that increased  
22 rainfall intensity combined with impervious urban surfaces are significant predictors of  
23 combined sewer overflows that greatly impact water quality.<sup>7,8</sup>

24  
25  
26 Improvements of water quality, sanitation, and hygiene (WASH) and oral cholera  
27 vaccine (OCV) are the major tools for the prevention of endemic cholera, including in urban  
28 slums. However, while WASH interventions are frequently employed to control cholera,  
29 evidence regarding their effectiveness is inconsistent and successful implementation may be  
30 stymied by limited cultural acceptability, low uptake, and poor community acceptance.<sup>9, 10, 11, 12</sup>  
31 Our cluster, randomized trial (CRT) of OCV and WASH in an urban Dhaka slum, which failed  
32 to demonstrate that WASH added to protection against severe cholera by OCV, is illustrative.<sup>13</sup>

33  
34  
35 In this re-analysis of the CRT, we examine households in the ‘non-intervention’ arm to  
36 investigate whether there were already WASH practices in the slums that correlated with a lower  
37 risk of severe cholera and that might contribute to the development of future effective,  
38 acceptable, and sustainable WASH interventions in cholera-endemic urban populations.

## 39 **Methods**

### 40 Trial and Population

1  
2  
3 In 2011, the International Centre for Diarrheal Disease Research, Bangladesh (icddr,b)  
4 conducted a cluster randomized control trial entitled ‘Introduction of cholera vaccine in  
5 Bangladesh (ICVB)’<sup>13</sup> in six selected wards of Mirpur, Dhaka to evaluate the feasibility and  
6 effectiveness of oral cholera vaccine (OCV), both deployed alone and in conjunction with  
7 WASH interventions. Vaccination with Shanchol, a two-dose OCV was carried out between 17  
8 February and 6 April, 2011.  
9

10  
11 Households were grouped into 90 geographic clusters with an average population of  
12 2988 households per cluster (ranging from 2288 to 4299 households per cluster). Clusters were  
13 randomly assigned (1:1:1) to one of three arms: a two-dose regimen of OCV alone, OCV with a  
14 WASH intervention, or no intervention (control).<sup>13</sup> The two doses of OCV were administered at  
15 a 14-day interval. The WASH intervention consisted of a behavioral change intervention which  
16 included a household handwashing station featuring a bottle of soapy water and a packet of soap,  
17 and a chlorine dispenser for the treatment of household drinking water.<sup>13</sup> Trained community  
18 health workers demonstrated handwashing and treatment of drinking water. Healthy, non-  
19 pregnant individuals aged one year or older were eligible for vaccination in this cluster  
20 randomized trial (CRT), and each cluster was separated from the adjoining cluster by at least a  
21 30-meter buffer area.  
22  
23

### 24 Demographic Surveillance

25 A baseline demographic census was conducted before the start of the ICVB vaccination  
26 campaign and updated bi-annually with information on births, deaths, and migrations. Verbal  
27 consent for participation in the surveillance was obtained and documented in a questionnaire at  
28 the time of the baseline census and at each bi-annual update. A “household” was defined as  
29 persons sharing the same cooking pot.  
30

31 In addition to the basic demographic information, household-level socioeconomic status,  
32 water-sanitation-hygiene (WASH) data, and geographical locations of each household were  
33 collected during the baseline census. For households that were not present at the baseline census,  
34 WASH characteristics were assessed at the first bi-annual census update they were captured in.  
35 Household WASH characteristics were not re-assessed for new births in a household already  
36 characterized during the study period. All individuals living in the study area were provided with  
37 a study identification card containing a unique participant identification (PID) number which was  
38 recorded in computerized study databases.  
39  
40  
41  
42  
43  
44  
45  
46  
47  
48

### 49 Disease Surveillance

50 Disease surveillance for cholera was conducted between April 2011 to November 2015 at  
51 twelve hospitals serving the study area. Study surveillance staff were present at each health  
52 facility throughout the day to facilitate reporting of diarrheal cases from the study area.  
53

54 Patients from the study area were identified in the treatment centers with their study  
55 identification card or by searching their identities in on-site computerized census database.  
56  
57  
58  
59  
60

1  
2  
3 Clinical examination was carried out by physicians, and designated study staff completed data  
4 forms and obtained fecal specimens after obtaining written informed consent.  
5

6 A diarrheal visit was defined as having 3 or more loose stools or, 1-2 or an indeterminate  
7 number of loose stools with evidence of dehydration, in the 24 hours before presentation<sup>13</sup>. If the  
8 date of discharge from an earlier diarrheal visit and the date of symptom onset for the subsequent  
9 diarrheal visit were within 7 days of one another, then both visits were considered part of the  
10 same diarrheal episode. The onset of a diarrheal episode was defined as starting on the day the  
11 patient first reported loose or liquid stools.  
12  
13

14 Fecal samples were examined for *V. cholerae* O1 or O139 serogroups and Inaba and  
15 Ogawa serotypes using conventional methods.<sup>13</sup> A cholera episode was defined as a diarrheal  
16 episode in which a fecal specimen yielded *V. cholerae* O1 or O139, with no passage of bloody  
17 stools during the episode. Severely dehydrating cholera was defined by the presence of at least  
18 two of the following symptoms of severe dehydration: sunken eyes, dry tongue, thirst, irritable  
19 condition, less active than usual along with inability to drink, skin pinch goes back slowly, or  
20 low volume of radial pulse<sup>13</sup>. A severe cholera episode was one in which the patient exhibited  
21 severe dehydration during any visit of the episode. The primary outcome in this analysis was the  
22 first severe cholera episode detected during follow-up.  
23  
24  
25  
26

### 27 Patient and Public Involvement

28 This analysis utilizes data that originates from the ICVB cluster randomized trial  
29 conducted by the icddr,b in 2011. Given that ten years have passed since the original study, the  
30 participants were not directly involved in developing or informing the design of the analysis  
31 described in this paper. That said, the original ICVB trial involved strong social mobilization and  
32 community engagement to improve the conduct of the study.  
33  
34

35 The research questions addressed in the ICVB cluster randomized trial were developed  
36 due to the pressing need to understand the impact of oral cholera vaccines in urban Bangladesh.  
37 Advocacy meetings with local government representatives, pediatric associations, and NGOs  
38 were held in order to inform the design and conduct of the ICVB trial.  
39  
40

### 41 **Analytical Approach**

#### 42 *Population Under Follow-up*

43 We considered a dynamic population for this analysis, which included the population  
44 present in the non-intervention arm at baseline and new entrants into the non-intervention study  
45 area during the study period. For those present at baseline, the start of follow-up was defined as  
46 the median date of first Shanchol dose in the nearest intervention cluster. For new residents, the  
47 start of follow up was defined as either the date of birth or the date of migration into the study area.  
48 The end of follow-up was defined as either the end of surveillance, 4-years after baseline; date of  
49 death; date of internal migration out of the cluster; date of migration out of the study area; or onset  
50 date of first severe cholera episode, whichever came first. Person-years of observation (PYO) were  
51 calculated from the sum of all follow up periods.  
52  
53  
54  
55  
56  
57  
58  
59  
60

### *Selection of WASH variables for analyses*

We first examined ten household WASH variables ascertained in the demographic censuses and categorized each variable (shared toilet, drinking water source, distance to source of drinking water, drinking water treatment, toilet type, water availability, waste disposal location, hand washing water available, hand washing soap available and shared kitchen) into two categories: “Better” versus “Not Better”. The categorization of WASH variables was based on local context-informed judgement and the distribution of WASH variables, but without prior information on cholera incidence rates associated with each variable category.

We randomly divided the “non-intervention arm” population into two subpopulations—50% of the households into a “training” population and the other 50% into a “validation” population. The training population was used to develop the composite WASH decision tree, and the validation population was subsequently used to cross-validate the decision tree rule. We selected WASH variables associated with risk of severe cholera using a Cox proportional hazard regression model at p-value <0.2 using the training population. We verified that each selected independent variable fulfilled proportionality assumptions before inclusion into the model.

### *Construction of decision tree to develop composite WASH variable*

We developed a composite rule for existing “Better” versus “Not Better” household WASH through a machine learning approach to measure the association between WASH status and the incidence of severe cholera. To create a single, binary composite WASH variable predicting the occurrence of severe cholera, we constructed a decision tree with a recursive partitioning approach including variables which were associated with severe cholera.<sup>15</sup>

Given relatively few endpoints compared to the total number of individuals followed, we accounted for the imbalanced case distribution within the construction of the decision tree. The decision tree was designed by assuming a 1:670 loss function for the cost of false positive and false negative classification, and by defining 300 as the minimum number of observations required in each terminal node. The number of cross-validations was 10. We ran the algorithm with the training subpopulation and subsequently pruned the tree by the minimal complexity parameter, corresponding to a minimum error with at least two terminal nodes to make the optimal decision for predicting severe cholera.

With the selected tree, a receiver operating characteristic (ROC) curve was constructed to find the optimal cut-off probability of the composite WASH variable for predicting the occurrence of severe cholera cases.<sup>16,17</sup> This threshold was used to classify the training population with the resulting binary composite WASH variable in relation to the risk of severe cholera: “Better” for lower probability of developing severe cholera, and “Not Better” for higher probability of developing severe cholera.

1  
2  
3 To assess the performance of the composite WASH, we applied the same rule to the  
4 validation population to confirm that the decision tree exhibited similar sensitivity and specificity  
5 in both populations.  
6

### 7 *Protective association between WASH and severe cholera*

8  
9  
10 Next, we measured the association between “Better” WASH household status and severe  
11 cholera in the total population residing in non-intervention clusters. To evaluate the protective  
12 association of “Better” WASH, we analyzed the time from start of follow-up to the first severe  
13 cholera case using the Cox proportional hazard regression model.  
14

15  
16 The model was adjusted for potential confounding covariates, including age in years at  
17 start of follow-up, sex, and variables reflecting socioeconomic status: monthly expenditure,  
18 house ownership, house having one room, and house wall constructed by brick/cement. We  
19 identified variables fitted into the model by mixed stepwise selection, using a combination of  
20 forward and backward selection with the cutoff p-value of 0.1 for both elimination and retention.  
21 Hazard ratios (HR) for severe cholera were estimated by exponentiating the coefficient for the  
22 composite WASH variable in models and protection was estimated as  $[(1 - HR) \times 100\%]$  with  
23 95% confidence intervals. Estimates were also adjusted for design effect of cluster  
24 randomization of the study clusters.  
25  
26  
27

28  
29 To determine cluster-level “Better” WASH coverage, the person-years of observation of  
30 household members living in “Better” WASH households in the cluster were divided by the  
31 person-years of the entire population in the same cluster. The association between cluster-level  
32 WASH coverage and incidence of severe cholera was assessed after adjustment for potential  
33 confounding variables (age, sex, monthly expenditure, house ownership, house having one room  
34 and house wall constructed by brick/cement) in proportional hazard models using the same  
35 approach.  
36  
37

38  
39 Statistical analyses were performed using R Studio analytical software for decision tree  
40 modeling (rpart package), tree plotting (rpart.plot package), and ROC curve illustration (pROC  
41 package). Other statistical analyses were performed using SAS version 9.4. All p values were  
42 two-sided.  
43

## 44 **Results**

### 45 Training and validation subpopulations

46  
47  
48 A total of 193,576 individuals in the non-intervention ICVB arm were included in the  
49 analysis (Figure 1). Of those, 80,720 individuals were present at baseline and 112,856  
50 individuals were new entrants (107,381 in-migration individuals, 5,475 births). During the four-  
51 years of follow-up, a total of 292 severe cholera episodes were observed. The training set was  
52 composed of 96,943 individuals, 144 of whom developed severe cholera. The validation set was  
53 composed of 96,633 individuals, 148 of whom developed severe cholera. As shown in Table 1,  
54  
55  
56  
57  
58  
59

baseline characteristics of the training and validation subpopulations were broadly comparable in terms of mean age, sex ratio, average monthly expenditure, and household characteristics.

**Table 1. Baseline characteristics of the total, training, and validation subpopulations**

|                                  | Total Population | Training sub-population | Validation sub-population |
|----------------------------------|------------------|-------------------------|---------------------------|
|                                  | n=193576         | n=96943                 | n=96633                   |
| Age in years - mean (std)        | 22.9 (15.4)      | 22.9 (15.3)             | 22.9 (15.4)               |
| Gender: Male - n (%)             | 94008 (48.6)     | 47365 (48.9)            | 46643 (48.3)              |
| Monthly Expenditure – mean (std) | 10288.6 (5374.1) | 10293.1 (4891.7)        | 10284.1 (5817.7)          |
| Ownership: Own house - n (%)     | 28677 (14.8)     | 14549 (15.0)            | 14128 (14.6)              |
| House: having one room - n (%)   | 165215 (85.3)    | 82427 (85.0)            | 82788 (85.7)              |
| Wall: Brick/Cement - n (%)       | 139860 (72.3)    | 69880 (72.1)            | 69980 (72.4)              |

\*std: standard deviation; n: number of individuals

#### Rule development for composite WASH variable predicting severe cholera case

A bivariate analysis for each variable in the training population was performed to measure associations of individual WASH-related variables with the risk of severe cholera (Table 2). Drinking water source (51% reduction of risk; 95% CI: -20-80), distance to source of drinking water (39% reduction of risk ; 95% CI: 14-57) and drinking water treatment (36% reduction of risk; 95% CI: 11-54) were selected to determine the composite binary WASH variable. The resulting tree, shown in Figure 2, found that treatment of drinking water was the dominant bifurcation; regardless of other WASH variables in the tree, not treating drinking water continually categorized the household as having “Not better” WASH.

**Table 2: Bivariate relationship of WASH variables with severe cholera risk in the training subpopulation**

| WASH Variable (and criteria for Better WASH categorization) | Better WASH |       |              |                              | Not Better WASH |       |              |                              | Protective association between each variable and severe cholera |         |
|-------------------------------------------------------------|-------------|-------|--------------|------------------------------|-----------------|-------|--------------|------------------------------|-----------------------------------------------------------------|---------|
|                                                             | N           | Cases | Person-years | IR (95% CI)<br>Per 100000/PY | N               | Cases | Person-years | IR (95% CI)<br>Per 100000/PY | Crude (95%CI)                                                   | P-value |
| <b>Shared toilet</b>                                        |             |       |              |                              |                 |       |              |                              |                                                                 |         |
| No                                                          | 4620        | 9     | 10253        | 88 (46, 169)                 | 92323           | 135   | 134076       | 101 (85, 119)                | 21 (-55, 60)                                                    | 0.49    |
| <b>Toilet type</b>                                          |             |       |              |                              |                 |       |              |                              |                                                                 |         |
| Sanitary latrine with or without flush                      | 80974       | 122   | 118747       | 103 (86, 123)                | 15969           | 22    | 25582        | 86 (57, 131)                 | -24 (-95, 21)                                                   | 0.36    |
| <b>Drinking Water Source:</b>                               |             |       |              |                              |                 |       |              |                              |                                                                 |         |
| Own tap/well/pump/bottled or vendor water                   | 4187        | 5     | 8993         | 56 (23, 134)                 | 92756           | 139   | 135337       | 103 (87, 121)                | 51 (-20, 80)                                                    | 0.12    |

1

2

3

4

5

6

7

8

9

10

11

12

13

14

15

16

17

18

19

20

21

22

23

24

25

26

27

28

29

30

31

32

33

34

35

36

37

38

39

40

41

42

43

44

45

46

47

48

49

50

51

52

53

54

55

56

57

58

59

60

|                                                           |       |     |        |               |       |    |       |                |                |       |
|-----------------------------------------------------------|-------|-----|--------|---------------|-------|----|-------|----------------|----------------|-------|
| <b>Water availability:</b>                                |       |     |        |               |       |    |       |                |                |       |
| <i>Tap/tube well/well water is available all the time</i> | 67831 | 95  | 93293  | 102 (83, 125) | 29112 | 49 | 51036 | 96 (73, 127)   | -15 (-64, 19)  | 0.43  |
| <b>Distance to source of drinking water</b>               |       |     |        |               |       |    |       |                |                |       |
| <i>Using median as cut off</i>                            | 43806 | 47  | 64461  | 73 (55, 97)   | 53137 | 97 | 79869 | 121 (100, 148) | 39 (14, 57)    | <0.01 |
| <b>Drinking Water Treatment:</b>                          |       |     |        |               |       |    |       |                |                |       |
| <i>Filtered/Boiled/chemical treated</i>                   | 54275 | 60  | 77380  | 78 (60, 100)  | 42668 | 84 | 66950 | 125 (101, 155) | 36 (11, 54)    | <0.01 |
| <b>Waste disposal location: Fixed</b>                     |       |     |        |               |       |    |       |                |                |       |
| <i>Fixed</i>                                              | 80198 | 109 | 116056 | 94 (78, 113)  | 16745 | 35 | 28273 | 124 (89, 172)  | 20 (-17, 46)   | 0.25  |
| <b>Hand Washing Water Available*</b>                      |       |     |        |               |       |    |       |                |                |       |
| <i>Yes</i>                                                | 93758 | 138 | 138159 | 100 (85, 118) | 3185  | 6  | 6170  | 97 (44, 216)   | -11 (-152, 51) | 0.8   |
| <b>Hand Washing Soap Available*</b>                       |       |     |        |               |       |    |       |                |                |       |
| <i>Yes</i>                                                | 91514 | 133 | 135316 | 98 (83, 117)  | 5429  | 11 | 9014  | 122 (68, 220)  | 17 (-54, 55)   | 0.56  |
| <b>Shared kitchen</b>                                     |       |     |        |               |       |    |       |                |                |       |
| <i>No</i>                                                 | 86713 | 118 | 120182 | 98 (82, 118)  | 10230 | 26 | 24147 | 108 (73, 158)  | -5 (-62, 32)   | 0.83  |

### Performance of the composite WASH variable predicting severe cholera

In the training set, we found that an optimal cut-off value of 0.0012 for the composite WASH variable was found to maximize the Youden index using the ROC curve, with an area under the curve (AUC) of 59% (95% CI: 55-63) (Figure 3). Under this threshold, the rule predicted 123 true positives of 144 severe cholera episodes, for a sensitivity of 85% (95% CI: 85-86), and 28,709 true negatives among 96,799 persons without severe cholera, yielding a specificity of 30% (95% CI: 22-37). The composite WASH variable performed similarly when applied to the validation set, with a sensitivity of 82% (95% CI: 82-82) and specificity of 30% (95% CI: 22-37).

### Prediction of severe cholera incidence by household WASH status in the total population

We applied the WASH prediction rule to the total population residing in the non-intervention clusters to predict severe cholera episode risk. 29.7% of households in the non-intervention arm were classified as having “Better” WASH and the remaining 70.3% were classified as having “Not Better” WASH.

The incidence of severe cholera in all age groups living in the “Better” WASH households was 57 per 100,000 person-years of observation (PYO), compared to 120 per 100,000 PYO in “Not Better” WASH households, a 47% (95% CI: 29-61,  $p<0.001$ ) reduced risk of severe cholera, after adjusting for covariates. The protective association between living in a “Better” WASH households and severe cholera risk was consistent in all age groups (Table 3). For individuals under the age of 15, living in a “Better” WASH households was associated with

having 64% (95% CI: 36-80;  $p<0.001$ ) reduced risk of severe cholera. The protective association of “Better” WASH household status was comparatively lower in the 15+ age-group, where “Better” WASH was associated with a 43% (95% CI: 16-61;  $p=0.004$ ) reduction in severe cholera risk.

**Table 3. Protective association between “Better” WASH and severe cholera in the total study population**

|            | “Better” WASH |       |              |                            | “Not Better” WASH |       |              |                            | Protective association between “Better” WASH and severe cholera |         |                   |         |
|------------|---------------|-------|--------------|----------------------------|-------------------|-------|--------------|----------------------------|-----------------------------------------------------------------|---------|-------------------|---------|
|            | n             | cases | Person-years | IR per 100000/PYs (95% CI) | N                 | cases | Person-years | IR per 100000/PYs (95% CI) | Crude (95%CI)                                                   | p-value | Adjusted* (95%CI) | p-value |
| <b>All</b> | 57396         | 48    | 84817        | 57 (43, 75)                | 136180            | 244   | 203701       | 120 (106, 136)             | 52 (34, 65)                                                     | <0.001  | 47 (29, 61)       | <0.001  |
| <5 years   | 7552          | 5     | 10518        | 48 (20, 114)               | 17149             | 42    | 24366        | 172 (127, 233)             | 72 (25, 89)                                                     | 0.012   | 69 (15, 88)       | 0.022   |
| 5-14 years | 8861          | 4     | 14618        | 27 (10, 73)                | 25318             | 32    | 42389        | 75 (53, 107)               | 63 (6, 85)                                                      | 0.037   | 63 (6, 85)        | 0.037   |
| 15+ years  | 40983         | 39    | 59680        | 65 (48, 89)                | 93713             | 170   | 136945       | 124 (107, 144)             | 46 (20, 64)                                                     | 0.002   | 43 (16, 61)       | 0.004   |

\* Adjusted for design effect and selected covariates by stepwise selection using cutoff 0.1 for both of elimination and addition; For entire population, selected covariates were age, gender, home ownership and house having one room; For <5 years, selected covariate was home ownership; For 5-14 years, no covariate was selected; For 15+ years, selected covariates were age, gender and house having one room;

There was a slight, non-significant negative association between rising proportion of “Better” WASH households in a cluster and incidence rate of severe cholera (Figure 4). In our model, for every ten percent increase in proportion of “Better” WASH households in a cluster, individuals living in that cluster experienced 4% lower risk of severe cholera, though this relationship was not significant (HR=0.996 (95% CI: 0.988-1.005;  $p$ -value: 0.40).

## Discussion

Using a machine learning approach, we developed a composite “Better” WASH variable to predict severe cholera risk using data from a prospective cohort study in a Dhaka slum. The “Better” WASH decision tree found that water quality and access were the most significant factors associated with severe cholera risk.

This finding is consistent with previous literature and findings from Wolfe and colleagues’ systematic review of case-control studies that found strong associations between



1  
2  
3 household water quality and lowered incidence of cholera.<sup>18</sup> In this review of mostly epidemic  
4 cholera contexts, the authors found that eight WASH-related risk factors, including unimproved  
5 water source, untreated water, unsafe water storage and transport, were consistently associated  
6 with higher odds of cholera. As such, the importance of water practices in our determination of  
7 “Better” WASH is in line with the prevailing understanding of cholera risk.  
8  
9  
10  
11

12  
13 In our analysis, we found that individuals living in “Better” WASH households had 47%  
14 (95% CI: 29-61) reduced risk of severe cholera compared to individuals living in “Not Better”  
15 WASH households, after adjusting for age, gender, and socioeconomic factors. This statistically  
16 significant protective association was demonstrated in all age groups examined, though those  
17 under-15 exhibited a greater degree of protection compared to those over-15. This difference by  
18 age group may stem from the differences in WASH behaviors and exposure to cholera—wherein  
19 individuals 15 and older are more likely to have many exposures outside of the household at  
20 school, work, or play that could reduce the protective effects of living in a “Better” WASH  
21 home.  
22  
23  
24

25  
26 There are several strengths to our analysis that lend credibility to the findings. The  
27 analysis was evaluated in the context of a prospective CRT in a well-defined population with  
28 comprehensive follow-up for cholera detection. We followed this population for four-years,  
29 making it one of the longest evaluations of the relationship between household WASH and  
30 severe cholera incidence, and thereby shedding light on the long-term durability of WASH  
31 adaptations. Further, during the development of the composite WASH rule we reduced bias by  
32 categorizing WASH variables without any prior knowledge of cholera incidence rate associated  
33 with each component category. We also rigorously validated the WASH prediction rule by using  
34 a validation sub-population to ensure that the rule was not over-fitted to the training sub-  
35 population.  
36  
37  
38

39  
40 Our analysis also has limitations. Firstly, household WASH variables were only  
41 evaluated once and applied to the whole study period. For the population present at baseline,  
42 household WASH status was evaluated once at the beginning of the study and applied to the  
43 entire four-year study period. As household WASH variables are more likely to improve rather  
44 than regress over time as household members age and income increases, this misclassification  
45 bias should have led to more conservative estimates of protective associations. Furthermore, it  
46 must be noted that the household WASH variables included in this study were collected in the  
47 context of an OCV trial through a brief questionnaire designed to assess confounding variables in  
48 the evaluation of vaccine effectiveness. This approach may have led to loss of information,  
49 making the WASH-cholera relationship conservative, and may also have identified variables that  
50 are “proxies” for actual water-related factors that directly mediate a reduced risk of cholera.  
51  
52  
53

54  
55 Consequently, the WASH variables included in the composite rule may best be interpreted as  
56  
57  
58  
59

1  
2  
3  
4 *markers* of these direct mediators. Nonetheless, because these variables predicted severe cholera  
5 risk independently of non-WASH socioeconomic factors, the analysis underscores the  
6 importance of water-related WASH adaptations in determining the risk of severe cholera in this  
7 setting.  
8  
9  
10

11 Our findings indicate that there are existing culturally acceptable WASH improvements  
12 that can be impactful in controlling cholera in a dense slum population considered to have  
13 hyperendemic cholera. Past experiences in WASH intervention programs have shown that  
14 achieving sustainable and effective WASH interventions can be challenging. For example, an  
15 evaluation of a household water treatment and handwashing campaign in rural Guatemala found  
16 that three years after the intervention there were no differences in handwashing behavior, WASH  
17 conditions, or prevalence of childhood diarrhea in the community<sup>19</sup>. Other examples of poor  
18 long-term uptake and acceptability of WASH interventions are found in programs implemented  
19 in India, Zambia, and Kenya—all highlighting the difficulty of sustained behavior adoption.<sup>20–22</sup>  
20 In fact in the ICVB trial from which this analysis originates, the WASH intervention was found  
21 to *not* improve effectiveness of OCV when combined, likely because of poor uptake in the  
22 community. In light of this, understanding *existing* “Better” WASH households and behaviors in  
23 endemic slum communities can provide valuable lessons on feasible and sustainable  
24 interventions.  
25  
26  
27  
28  
29  
30

31 Recent studies have also found that Mirpur, Bangladesh, the site for this study, has very  
32 high rates of microbiological proliferation and contamination in the municipal water supply,<sup>23</sup>  
33 making achievable WASH improvements paramount to improving community health. Our  
34 analysis finds that there are existing household water adaptations in Mirpur that are associated  
35 with significantly lowered severe cholera risk, despite contaminated water at the municipal level.  
36 The fact that the WASH adaptations practiced by 30% of the population were significantly  
37 predictive of lower cholera risk even within slum conditions speaks to the potential for existing  
38 knowledge to inform cholera control strategies.  
39  
40  
41  
42  
43  
44

45 Cholera transmission in urban slums may only intensify with the pressures of rapid  
46 urbanization combined with climate change effects on temperature and precipitation. Endemic  
47 cholera in urban areas is a reality in Bangladesh that faces different challenges from previously  
48 studied epidemic and rural cholera transmission. Closely examining how some urban households  
49 have already made WASH adaptations to reduce cholera risk and leveraging existing practices in  
50 the slums will help design effective cholera control programs that are sustainable and achievable.  
51  
52  
53  
54  
55  
56  
57  
58  
59  
60

### **Data Availability Statement**

Data will be made available in a public, open access repository.

### **Ethics Statement**

This study is a re-analysis of data from a cluster randomized trial entitled 'Introduction of cholera vaccine in Bangladesh (ICVB)' conducted by the icddr,b in 2011. The ICVB trial received Institutional Review Board approval (icddr,b protocol number PR#17124) and Bangladesh National Research Ethics Committee approval. Participants gave informed consent to participate in the study before taking part.

### **Author Contributions**

JDC conceptualized the study. SK and FC prepared the original draft. Data analysis was carried out by JP, FA, and DRK. Additionally JDC, FQ, FM, JHK, and AIK supervised the study. All authors participated in the writing of the manuscript and interpreting the data. All authors reviewed and approved the final manuscript.

### **Competing Interests**

There are no competing interests from any of the authors.

### **Funding**

This work was supported, in whole or in part, by the Bill & Melinda Gates Foundation [INV 025386]. Under the grant conditions of the Foundation, a Creative Commons Attribution 4.0 Generic License has already been assigned to the Author Accepted Manuscript version that might arise from this submission.

### **Acknowledgement**

Icddr,b is grateful to the Governments of Bangladesh, Canada, Sweden and the UK for providing unrestricted support. Thanks to Dr. Nigel McMillan (Griffith University) for his scientific and technical support in the manuscript. The funders had no role in study design, data collection and analysis, decision to publish, or preparation of the manuscript.

### **Figure Legends**

Figure 1. CONSORT- Dynamic population during 4-year follow up period

Figure 2. Rule predicting severe cholera episode risk in the training subpopulation

Figure 3. ROC curve for the performance of the decision rule in the training subpopulation

Figure 4. Relationship between cluster-level "Better" WASH coverage and risk of severe cholera

1  
2  
3  
4  
5  
6  
7  
8  
9  
10  
11  
12  
13  
14  
15  
16  
17  
18  
19  
20  
21  
22  
23  
24  
25  
26  
27  
28  
29  
30  
31  
32  
33  
34  
35  
36  
37  
38  
39  
40  
41  
42  
43  
44  
45  
46  
47  
48  
49  
50  
51  
52  
53  
54  
55  
56  
57  
58  
59  
60

## References

1. Ritchie, H. & Roser, M. Urbanization. *Our World Data* (2018).
2. Dhaka: fastest growing megacity in the world. *The World from PRX*  
<https://www.pri.org/stories/2010-09-08/dhaka-fastest-growing-megacity-world>.
3. Ross, A. G. P., Zaman, K. & Clemens, J. D. Health Concerns in Urban Slums: A Glimpse of Things to Come? *JAMA* **321**, 1973–1974 (2019).
4. Islam, M. T., Clemens, J. D. & Qadri, F. Cholera Control and Prevention in Bangladesh: An Evaluation of the Situation and Solutions. *J. Infect. Dis.* **218**, S171–S172 (2018).

- 1  
2  
3  
4 5. Longini, I. M., Jr. *et al.* Epidemic and Endemic Cholera Trends over a 33-Year Period in Bangladesh.  
5  
6  
7 *J. Infect. Dis.* **186**, 246–251 (2002).  
8  
9
- 10 6. Asadgol, Z. *et al.* How climate change can affect cholera incidence and prevalence? A systematic  
11  
12 review. *Environ. Sci. Pollut. Res.* **27**, 34906–34926 (2020).  
13  
14
- 15 7. Salerno, F., Gaetano, V. & Gianni, T. Urbanization and climate change impacts on surface water  
16  
17 quality: Enhancing the resilience by reducing impervious surfaces. *Water Res.* **144**, 491–502 (2018).  
18  
19
- 20 8. Kumar, M., Deka, J. P. & Kumari, O. Development of Water Resilience Strategies in the context of  
21  
22 climate change, and rapid urbanization: A discussion on vulnerability mitigation. *Groundw. Sustain.*  
23  
24  
25  
26  
27  
28 *Dev.* **10**, 100308 (2020).  
29  
30
- 31 9. Taylor, D. L., Kahawita, T. M., Cairncross, S. & Ensink, J. H. J. The Impact of Water, Sanitation and  
32  
33 Hygiene Interventions to Control Cholera: A Systematic Review. *PLOS ONE* **10**, e0135676 (2015).  
34  
35  
36
- 37 10. George, C. M. *et al.* Randomized Controlled Trial of Hospital-Based Hygiene and Water Treatment  
38  
39 Intervention (CHoBI7) to Reduce Cholera. *Emerg. Infect. Dis.* **22**, 233–241 (2016).  
40  
41  
42
- 43 11. Luby, S. P., Davis, J., Brown, R. R., Gorelick, S. M. & Wong, T. H. F. Broad approaches to cholera  
44  
45 control in Asia: Water, sanitation and handwashing. *Vaccine* **38 Suppl 1**, A110–A117 (2020).  
46  
47  
48
- 49 12. Childs, L. *et al.* Evaluation of Knowledge and Practices Regarding Cholera, Water Treatment,  
50  
51 Hygiene, and Sanitation Before and After an Oral Cholera Vaccination Campaign-Haiti, 2013-2014.  
52  
53  
54  
55  
56  
57  
58  
59 *Am. J. Trop. Med. Hyg.* **95**, 1305–1313 (2016).  
60

- 1  
2  
3  
4 13. Qadri, F. *et al.* Feasibility and effectiveness of oral cholera vaccine in an urban endemic setting in  
5  
6 Bangladesh: a cluster randomised open-label trial. *The Lancet* **386**, 1362–1371 (2015).  
7  
8  
9  
10 14. Khan, I. A. *et al.* Organization and implementation of an oral cholera vaccination campaign in an  
11  
12 endemic urban setting in Dhaka, Bangladesh. *Glob. Health Action* **12**, (2019).  
13  
14  
15  
16 15. Strobl, C., Malley, J. & Tutz, G. An Introduction to Recursive Partitioning: Rationale, Application  
17  
18 and Characteristics of Classification and Regression Trees, Bagging and Random Forests. *Psychol.*  
19  
20  
21  
22 *Methods* **14**, 323–348 (2009).  
23  
24  
25 16. Hand, D. J. Measuring classifier performance: a coherent alternative to the area under the ROC curve.  
26  
27  
28  
29  
30  
31  
32 17. Faraggi, D. & Reiser, B. Estimation of the area under the ROC curve. *Stat. Med.* **21**, 3093–3106  
33  
34 (2002).  
35  
36  
37  
38 18. Wolfe, M., Kaur, M., Yates, T., Woodin, M. & Lantagne, D. A Systematic Review and Meta-  
39  
40  
41 Analysis of the Association between Water, Sanitation, and Hygiene Exposures and Cholera in Case-  
42  
43  
44 Control Studies. *Am. J. Trop. Med. Hyg.* **99**, 534–545 (2018).  
45  
46  
47 19. Arnold, B., Arana, B., Mäusezahl, D., Hubbard, A. & Colford, J. M., Jr. Evaluation of a pre-existing,  
48  
49  
50 3-year household water treatment and handwashing intervention in rural Guatemala. *Int. J.*  
51  
52  
53  
54  
55  
56  
57  
58  
59  
60

- 1  
2  
3  
4 20. Makutsa, P. *et al.* Challenges in Implementing a Point-of-Use Water Quality Intervention in Rural  
5  
6 Kenya. *Am. J. Public Health* **91**, 1571–1573 (2001).  
7  
8  
9  
10 21. Firth, J. *et al.* Point-of-Use Interventions to Decrease Contamination of Drinking Water: A  
11  
12 Randomized, Controlled Pilot Study on Efficacy, Effectiveness, and Acceptability of Closed  
13  
14 Containers, Moringa oleifera, and In-home Chlorination in Rural South India. *Am. J. Trop. Med.*  
15  
16 *Hyg.* **82**, 759–765 (2010).  
17  
18  
19  
20 22. Peletz, R. *et al.* Follow-Up Study to Assess the Use and Performance of Household Filters in Zambia.  
21  
22  
23 *Am. J. Trop. Med. Hyg.* **89**, 1190–1194 (2013).  
24  
25  
26  
27  
28 23. Acharjee, M., Rahman, F., Jahan, F. & Noor, R. Bacterial Proliferation in Municipal Water Supplied  
29  
30 in Mirpur Locality of Dhaka City, Bangladesh: Microbiological Study of Municipal Water. *CLEAN-*  
31  
32 *Soil Air Water* **42**, 434–441 (2014).  
33  
34  
35  
36  
37  
38  
39  
40  
41  
42  
43  
44  
45  
46  
47  
48  
49  
50  
51  
52  
53  
54  
55  
56  
57  
58  
59  
60

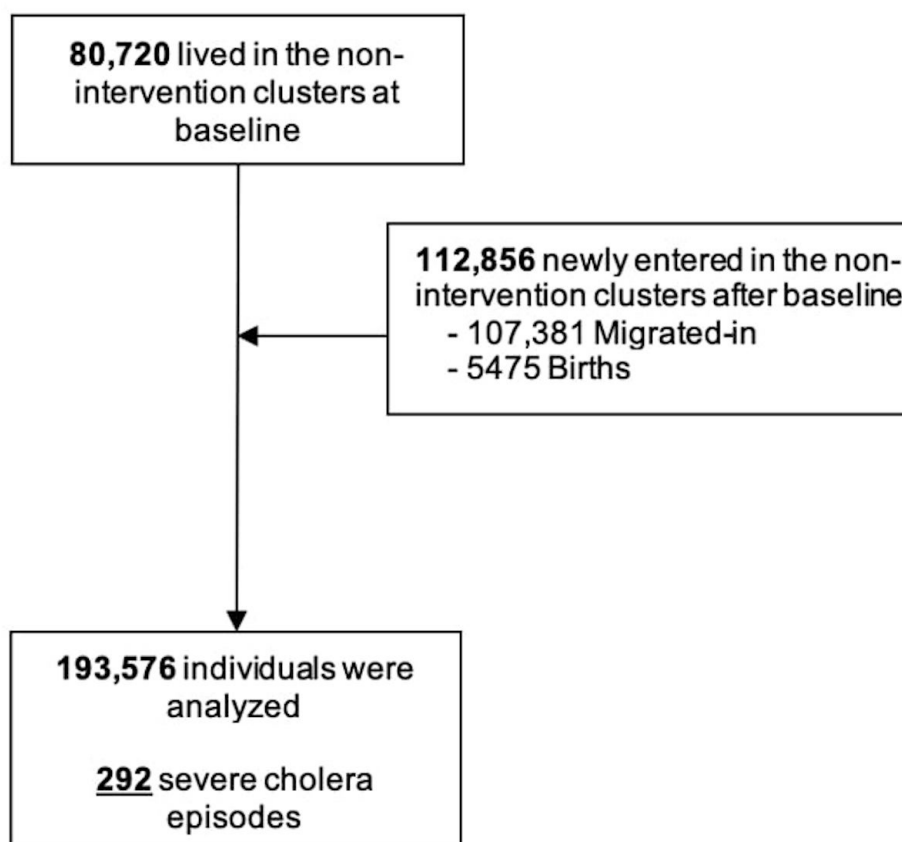

Figure 1: CONSORT- Dynamic population during 4-year follow up period

109x102mm (300 x 300 DPI)



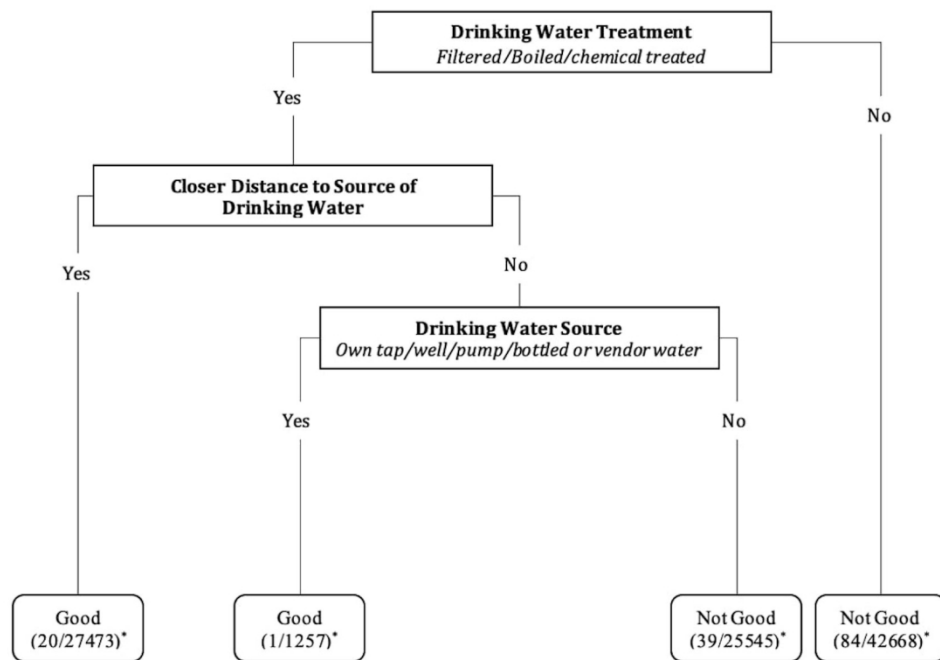

28  
29  
30  
31  
32  
33  
34  
35  
36  
37  
38  
39  
40  
41  
42  
43  
44  
45  
46  
47  
48  
49  
50  
51  
52  
53  
54  
55  
56  
57  
58  
59  
60

\* Number of severe cholera cases / household population in the training subpopulation

Figure 2. Rule predicting severe cholera episode risk in the training subpopulation

150x115mm (300 x 300 DPI)

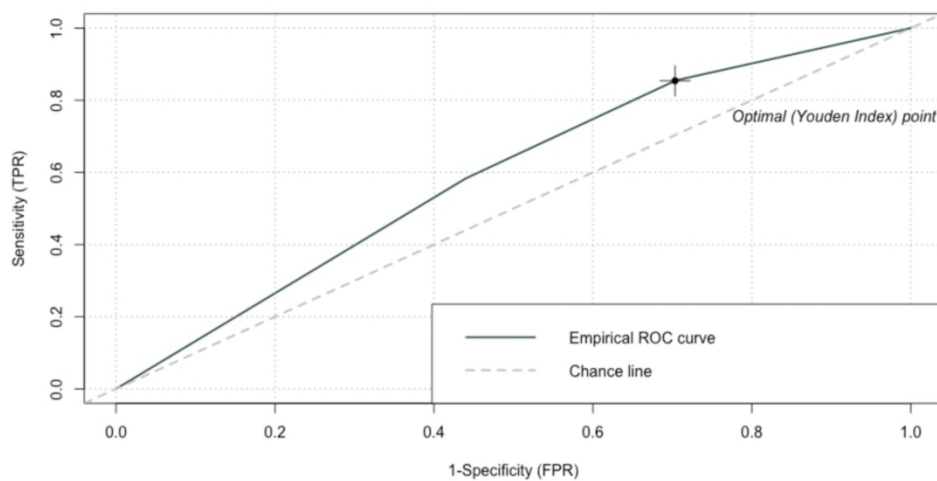

AUC = 59% (95% CI, 55-63); optimal cut-off probability using the Youden index = 0.0012

Figure 3. ROC curve for the performance of the decision rule in the training subpopulation

180x100mm (300 x 300 DPI)

1  
2  
3  
4  
5  
6  
7  
8  
9  
10  
11  
12  
13  
14  
15  
16  
17  
18  
19  
20  
21  
22  
23  
24  
25  
26  
27  
28  
29  
30  
31  
32  
33  
34  
35  
36  
37  
38  
39  
40  
41  
42  
43  
44  
45  
46  
47  
48  
49  
50  
51  
52  
53  
54  
55  
56  
57  
58  
59  
60

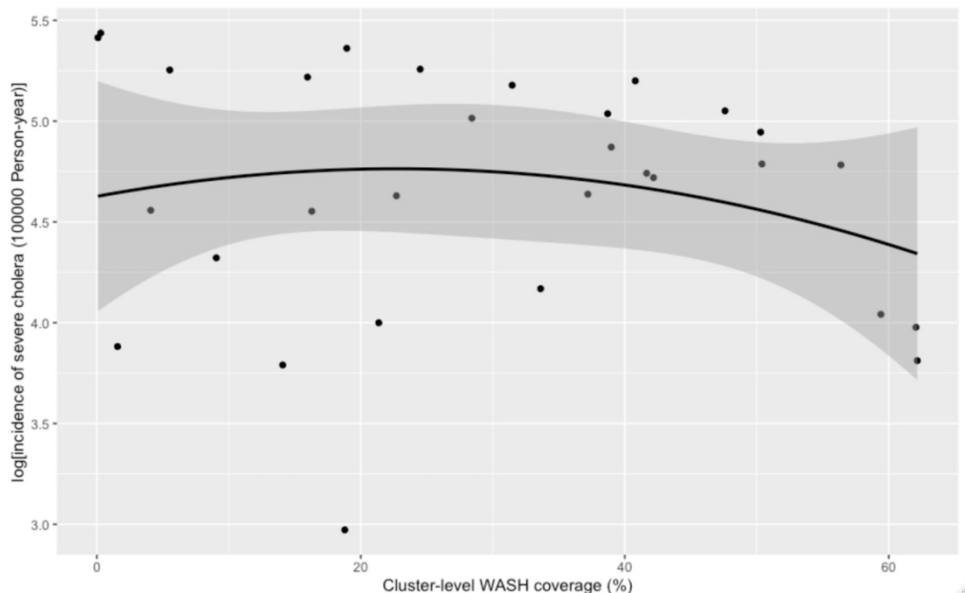

Figure 4. Relationship between cluster-level “Better” WASH coverage and risk of severe cholera  
189x119mm (300 x 300 DPI)

STROBE Statement—Checklist of items that should be included in reports of *cohort studies*

|                           | Item No | Recommendation                                                                                                                                                                                                                                                                                                         | Page No                       |
|---------------------------|---------|------------------------------------------------------------------------------------------------------------------------------------------------------------------------------------------------------------------------------------------------------------------------------------------------------------------------|-------------------------------|
| <b>Title and abstract</b> | 1       | (a) Indicate the study's design with a commonly used term in the title or the abstract                                                                                                                                                                                                                                 | 1                             |
|                           |         | (b) Provide in the abstract an informative and balanced summary of what was done and what was found                                                                                                                                                                                                                    | 2                             |
| <b>Introduction</b>       |         |                                                                                                                                                                                                                                                                                                                        |                               |
| Background/rationale      | 2       | Explain the scientific background and rationale for the investigation being reported                                                                                                                                                                                                                                   | 4                             |
| Objectives                | 3       | State specific objectives, including any prespecified hypotheses                                                                                                                                                                                                                                                       | 4                             |
| <b>Methods</b>            |         |                                                                                                                                                                                                                                                                                                                        |                               |
| Study design              | 4       | Present key elements of study design early in the paper                                                                                                                                                                                                                                                                | 1-2                           |
| Setting                   | 5       | Describe the setting, locations, and relevant dates, including periods of recruitment, exposure, follow-up, and data collection                                                                                                                                                                                        | 2, 4-5                        |
| Participants              | 6       | (a) Give the eligibility criteria, and the sources and methods of selection of participants. Describe methods of follow-up<br>(b) For matched studies, give matching criteria and number of exposed and unexposed                                                                                                      | 5-6<br>N/A                    |
| Variables                 | 7       | Clearly define all outcomes, exposures, predictors, potential confounders, and effect modifiers. Give diagnostic criteria, if applicable                                                                                                                                                                               | 5-6                           |
| Data sources/measurement  | 8*      | For each variable of interest, give sources of data and details of methods of assessment (measurement). Describe comparability of assessment methods if there is more than one group                                                                                                                                   | 5-7                           |
| Bias                      | 9       | Describe any efforts to address potential sources of bias                                                                                                                                                                                                                                                              | 6-7                           |
| Study size                | 10      | Explain how the study size was arrived at                                                                                                                                                                                                                                                                              | N/A                           |
| Quantitative variables    | 11      | Explain how quantitative variables were handled in the analyses. If applicable, describe which groupings were chosen and why                                                                                                                                                                                           | 6-7                           |
| Statistical methods       | 12      | (a) Describe all statistical methods, including those used to control for confounding<br>(b) Describe any methods used to examine subgroups and interactions<br>(c) Explain how missing data were addressed<br>(d) If applicable, explain how loss to follow-up was addressed<br>(e) Describe any sensitivity analyses | 6-8<br>6-8<br>N/A<br>6<br>N/A |
| <b>Results</b>            |         |                                                                                                                                                                                                                                                                                                                        |                               |
| Participants              | 13*     | (a) Report numbers of individuals at each stage of study—eg numbers potentially eligible, examined for eligibility, confirmed eligible, included in the study, completing follow-up, and analysed<br>(b) Give reasons for non-participation at each stage<br>(c) Consider use of a flow diagram                        | 8<br>N/A<br>12                |
| Descriptive data          | 14*     | (a) Give characteristics of study participants (eg demographic, clinical, social) and information on exposures and potential confounders<br>(b) Indicate number of participants with missing data for each variable of interest<br>(c) Summarise follow-up time (eg, average and total amount)                         | 13<br>N/A<br>8                |
| Outcome data              | 15*     | Report numbers of outcome events or summary measures over time                                                                                                                                                                                                                                                         | 8                             |

|    |                          |    |                                                                                                                                                                                                              |       |
|----|--------------------------|----|--------------------------------------------------------------------------------------------------------------------------------------------------------------------------------------------------------------|-------|
| 1  | Main results             | 16 | (a) Give unadjusted estimates and, if applicable, confounder-adjusted estimates and their precision (eg, 95% confidence interval). Make clear which confounders were adjusted for and why they were included | 9     |
| 2  |                          |    | (b) Report category boundaries when continuous variables were categorized                                                                                                                                    | N/A   |
| 3  |                          |    | (c) If relevant, consider translating estimates of relative risk into absolute risk for a meaningful time period                                                                                             | N/A   |
| 4  |                          |    |                                                                                                                                                                                                              |       |
| 5  |                          |    |                                                                                                                                                                                                              |       |
| 6  |                          |    |                                                                                                                                                                                                              |       |
| 7  |                          |    |                                                                                                                                                                                                              |       |
| 8  |                          |    |                                                                                                                                                                                                              |       |
| 9  | Other analyses           | 17 | Report other analyses done—eg analyses of subgroups and interactions, and sensitivity analyses                                                                                                               | 11    |
| 10 |                          |    |                                                                                                                                                                                                              |       |
| 11 | <b>Discussion</b>        |    |                                                                                                                                                                                                              |       |
| 12 |                          |    |                                                                                                                                                                                                              |       |
| 13 | Key results              | 18 | Summarise key results with reference to study objectives                                                                                                                                                     | 10    |
| 14 | Limitations              | 19 | Discuss limitations of the study, taking into account sources of potential bias or imprecision. Discuss both direction and magnitude of any potential bias                                                   | 12    |
| 15 |                          |    |                                                                                                                                                                                                              |       |
| 16 | Interpretation           | 20 | Give a cautious overall interpretation of results considering objectives, limitations, multiplicity of analyses, results from similar studies, and other relevant evidence                                   | 11-13 |
| 17 |                          |    |                                                                                                                                                                                                              |       |
| 18 | Generalisability         | 21 | Discuss the generalisability (external validity) of the study results                                                                                                                                        | 12-13 |
| 19 |                          |    |                                                                                                                                                                                                              |       |
| 20 |                          |    |                                                                                                                                                                                                              |       |
| 21 | <b>Other information</b> |    |                                                                                                                                                                                                              |       |
| 22 |                          |    |                                                                                                                                                                                                              |       |
| 23 | Funding                  | 22 | Give the source of funding and the role of the funders for the present study and, if applicable, for the original study on which the present article is based                                                | 13    |
| 24 |                          |    |                                                                                                                                                                                                              |       |
| 25 |                          |    |                                                                                                                                                                                                              |       |

26 \*Give information separately for exposed and unexposed groups.

27  
28  
29 **Note:** An Explanation and Elaboration article discusses each checklist item and gives methodological background and published examples of transparent reporting. The STROBE checklist is best used in conjunction with this article (freely available on the Web sites of PLoS Medicine at <http://www.plosmedicine.org/>, Annals of Internal Medicine at <http://www.annals.org/>, and Epidemiology at <http://www.epidem.com/>). Information on the STROBE Initiative is available at <http://www.strobe-statement.org>.

30  
31  
32  
33  
34  
35  
36  
37  
38  
39  
40  
41  
42  
43  
44  
45  
46  
47  
48  
49  
50  
51  
52  
53  
54  
55  
56  
57  
58  
59  
60

# BMJ Open

**Are better existing WASH practices in urban slums associated with a lower long-term risk of severe cholera? A prospective cohort study with four years of follow-up in Mirpur, Bangladesh**

|                               |                                                                                                                                                                                                                                                                                                                                                                                                                                                                                                                                                                                                                                                                                                                                                                                                                                                                                                                                                                                                                                                                                                                                                                                                                                                                                                                                                                                                                                                                                                                                                                                                                                                                                                                                                                                                                                                                                                  |
|-------------------------------|--------------------------------------------------------------------------------------------------------------------------------------------------------------------------------------------------------------------------------------------------------------------------------------------------------------------------------------------------------------------------------------------------------------------------------------------------------------------------------------------------------------------------------------------------------------------------------------------------------------------------------------------------------------------------------------------------------------------------------------------------------------------------------------------------------------------------------------------------------------------------------------------------------------------------------------------------------------------------------------------------------------------------------------------------------------------------------------------------------------------------------------------------------------------------------------------------------------------------------------------------------------------------------------------------------------------------------------------------------------------------------------------------------------------------------------------------------------------------------------------------------------------------------------------------------------------------------------------------------------------------------------------------------------------------------------------------------------------------------------------------------------------------------------------------------------------------------------------------------------------------------------------------|
| Journal:                      | <i>BMJ Open</i>                                                                                                                                                                                                                                                                                                                                                                                                                                                                                                                                                                                                                                                                                                                                                                                                                                                                                                                                                                                                                                                                                                                                                                                                                                                                                                                                                                                                                                                                                                                                                                                                                                                                                                                                                                                                                                                                                  |
| Manuscript ID                 | bmjopen-2022-060858.R1                                                                                                                                                                                                                                                                                                                                                                                                                                                                                                                                                                                                                                                                                                                                                                                                                                                                                                                                                                                                                                                                                                                                                                                                                                                                                                                                                                                                                                                                                                                                                                                                                                                                                                                                                                                                                                                                           |
| Article Type:                 | Original research                                                                                                                                                                                                                                                                                                                                                                                                                                                                                                                                                                                                                                                                                                                                                                                                                                                                                                                                                                                                                                                                                                                                                                                                                                                                                                                                                                                                                                                                                                                                                                                                                                                                                                                                                                                                                                                                                |
| Date Submitted by the Author: | 30-May-2022                                                                                                                                                                                                                                                                                                                                                                                                                                                                                                                                                                                                                                                                                                                                                                                                                                                                                                                                                                                                                                                                                                                                                                                                                                                                                                                                                                                                                                                                                                                                                                                                                                                                                                                                                                                                                                                                                      |
| Complete List of Authors:     | <p>Kang, Sophie; International Vaccine Institute, Epidemiology, Public Health, and Impact Unit<br/> Chowdhury, Fahima; International Centre for Diarrhoeal Disease Research Bangladesh; Griffith University Menzies Health Institute Queensland<br/> Park, Juyeon; International Vaccine Institute, Epidemiology, Public Health, and Impact Unit; University of Cambridge, Department of Medicine<br/> Ahmed, Tasnuva; International Centre for Diarrhoeal Disease Research Bangladesh<br/> Tadesse, Birkneh Tilahun; International Vaccine Institute, Epidemiology, Public Health, and Impact Unit<br/> Islam, Md. Taufiqul; International Centre for Diarrhoeal Disease Research Bangladesh<br/> Kim, Deok Ryun; International Vaccine Institute, Epidemiology, Public Health, and Impact Unit<br/> Im, Justin; International Vaccine Institute<br/> Aziz, Asma; International Vaccine Institute, Epidemiology, Public Health, and Impact Unit<br/> Hoque, Masuma; International Centre for Diarrhoeal Disease Research Bangladesh<br/> Pak, GiDeok; International Vaccine Institute<br/> Khanam, Farhana; International Centre for Diarrhoeal Disease Research Bangladesh<br/> Ahmmed, Faisal; International Centre for Diarrhoeal Disease Research Bangladesh<br/> Liu , Xinxue ; University of Oxford Oxford Vaccine Group<br/> Zaman, K; International Centre for Diarrhoeal Disease Research Bangladesh<br/> Khan, Ashraf Islam; International Centre for Diarrhoeal Disease Research<br/> Kim, Jerome ; International Vaccine Institute<br/> Marks, Florian ; International Vaccine Institute; University of Cambridge, Department of Medicine<br/> Qadri, Firdausi ; International Centre for Diarrhoeal Disease Research Bangladesh<br/> Clemens, John; International Vaccine Institute, Epidemiology, Public Health, and Impact Unit; International Centre for Diarrhoeal Disease</p> |

1  
2  
3  
4  
5  
6  
7  
8  
9  
10  
11  
12  
13  
14  
15  
16  
17  
18  
19  
20  
21  
22  
23  
24  
25  
26  
27  
28  
29  
30  
31  
32  
33  
34  
35  
36  
37  
38  
39  
40  
41  
42  
43  
44  
45  
46  
47  
48  
49  
50  
51  
52  
53  
54  
55  
56  
57  
58  
59  
60

|                                    |                                                                                      |
|------------------------------------|--------------------------------------------------------------------------------------|
|                                    | Research Bangladesh                                                                  |
| <b>Primary Subject Heading</b> :   | Global health                                                                        |
| <b>Secondary Subject Heading</b> : | Epidemiology, Infectious diseases, Public health                                     |
| <b>Keywords</b> :                  | EPIDEMIOLOGY, Epidemiology < INFECTIOUS DISEASES, INFECTIOUS DISEASES, PUBLIC HEALTH |
|                                    |                                                                                      |

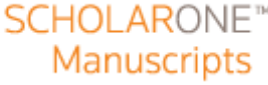

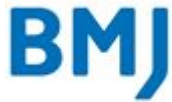

I, the Submitting Author has the right to grant and does grant on behalf of all authors of the Work (as defined in the below author licence), an exclusive licence and/or a non-exclusive licence for contributions from authors who are: i) UK Crown employees; ii) where BMJ has agreed a CC-BY licence shall apply, and/or iii) in accordance with the terms applicable for US Federal Government officers or employees acting as part of their official duties; on a worldwide, perpetual, irrevocable, royalty-free basis to BMJ Publishing Group Ltd ("BMJ") its licensees and where the relevant Journal is co-owned by BMJ to the co-owners of the Journal, to publish the Work in this journal and any other BMJ products and to exploit all rights, as set out in our [licence](#).

The Submitting Author accepts and understands that any supply made under these terms is made by BMJ to the Submitting Author unless you are acting as an employee on behalf of your employer or a postgraduate student of an affiliated institution which is paying any applicable article publishing charge ("APC") for Open Access articles. Where the Submitting Author wishes to make the Work available on an Open Access basis (and intends to pay the relevant APC), the terms of reuse of such Open Access shall be governed by a Creative Commons licence – details of these licences and which [Creative Commons](#) licence will apply to this Work are set out in our licence referred to above.

Other than as permitted in any relevant BMJ Author's Self Archiving Policies, I confirm this Work has not been accepted for publication elsewhere, is not being considered for publication elsewhere and does not duplicate material already published. I confirm all authors consent to publication of this Work and authorise the granting of this licence.



1  
2  
3  
4 **Are better existing WASH practices in urban slums associated with a lower long-**  
5 **term risk of severe cholera? A prospective cohort study with four years of follow-**  
6 **up in Mirpur, Bangladesh**  
7  
8  
9

10  
11 Sophie Kang<sup>1\*</sup>, Fahima Chowdhury<sup>2,7\*</sup>, Juyeon Park<sup>1,4</sup>, Tasnuva Ahmed<sup>2</sup>,  
12 Birkneh Tilahun Tadesse<sup>1</sup>, Md. Taufiqul Islam<sup>2</sup>, Deok Ryun Kim<sup>1</sup>, Justin Im<sup>1</sup>,  
13 Asma Binte Aziz<sup>1</sup>, Masuma Hoque<sup>2</sup>, Gideok Pak<sup>1</sup>, Farhana Khanam<sup>2</sup>, Faisal  
14 Ahmmed<sup>2</sup>, Xinxue Liu<sup>3</sup>, Khalequ Zaman<sup>2</sup>, Ashraful Islam Khan<sup>2</sup>, Jerome H. Kim<sup>1</sup>, Florian  
15 Marks<sup>1,4,5</sup>, Firdausi Qadri<sup>2</sup>, John D. Clemens<sup>1,2,6</sup>  
16  
17  
18  
19  
20

21 1 International Vaccine Institute, Seoul, Republic of Korea  
22

23 2 International Centre for Diarrheal Disease Research, Bangladesh, Dhaka, Bangladesh  
24

25 3 Oxford Vaccine Group, Department of Pediatrics, University of Oxford, Oxford OX3 9DU,  
26  
27

28 UK  
29

30 4 Department of Medicine, University of Cambridge, Cambridge, United Kingdom  
31

32 5 University of Antananarivo, Antananarivo, Madagascar  
33

34 6 UCLA Fielding School of Public Health, Los Angeles, CA 90095-1772, USA  
35

36 7 Menzies Health Institute Queensland, Griffith University, Gold Coast, Australia  
37  
38

39 \* Contributed equally  
40  
41  
42  
43

44 Correspondence to Sophie Kang, International Vaccine Institute; Sophie.kang@ivi.int  
45  
46  
47  
48  
49  
50  
51  
52  
53  
54  
55  
56  
57  
58  
59  
60

## Abstract

### Objective

To investigate the association between existing household WASH practices and severe cholera risk in a dense urban slum where cholera is highly endemic.

### Design, Setting, and Participants

We assembled a large prospective cohort within a cluster randomized trial evaluating the effectiveness of oral cholera vaccine. Our dynamic cohort population (n=193,576) comprised individuals living in the “non-intervention” clusters of the trial, and were followed over four years. This study was conducted in a dense urban slum community of Dhaka, Bangladesh and cholera surveillance was undertaken in twelve hospitals serving the study area.

### Primary outcome measure

First severe cholera episode detected during follow-up period.

### Methods

1  
2  
3  
4 We applied a machine learning algorithm on a training subpopulation (n=96,943) to develop a  
5 binary (“Better”, “Not Better”) composite WASH variable predictive of severe cholera. The  
6 WASH rule was evaluated for performance in a separate validation subpopulation (n=96,633).  
7  
8 Afterwards, we used Cox-regression models to evaluate the association between “Better” WASH  
9 households and severe cholera risk over 4 years in the entire study population.  
10  
11  
12

### 13 Results

14  
15 The “Better” WASH rule found that water quality and access were the most significant factors  
16 associated with severe cholera risk. Members of “Better” WASH households, constituting one-  
17 third of the population, had a 47% reduced risk of severe cholera (95% CI: 29-69; *p*-value  
18 <0.001), after adjusting for covariates. The protective association between living in a “Better”  
19 WASH household and severe cholera persisted in all age groups.  
20  
21  
22  
23

### 24 Conclusions

25  
26 Salutory existing household WASH practices were associated with a significantly reduced long-  
27 term risk of severe cholera in an urban slum of Dhaka. These findings suggest that WASH  
28 adaptations already practiced in the community may be important for developing and  
29 implementing effective and sustainable cholera control programs in similar settings.  
30  
31  
32  
33  
34  
35  
36  
37  
38  
39  
40  
41  
42  
43  
44  
45  
46  
47  
48  
49  
50  
51

### 52 **Strengths and limitations of this study**

53  
54  
55  
56  
57  
58  
59  
60

- We studied a cohort prospectively followed for four years, making this analysis one of the longest uninterrupted evaluations of the relationship between household WASH and endemic cholera.
- The multivariable WASH prediction rule was rigorously validated using a separate sub-population and thus avoided overfitting to the training set.
- We focused on the existing variability of household WASH within a dense slum community to demonstrate that there are salutary practices that may reduce the long-term risk of severe cholera.
- Household WASH factors were only evaluated once, either at baseline or when participants entered the study area, and this status applied to the entire follow-up period .
- The household WASH variables included in this study were collected in the context of an OCV trial and not optimized for describing WASH factors independently.

## Introduction

The developing world has seen a rapid expansion of urban areas due, in part, to influxes into squalid urban slums. With an estimated 55% of the world's population living in urban areas, 1-in-3 of those urban dwellers live in slum households<sup>1</sup>. Slum households are defined as those which lack one or more of the following conditions: access to improved water, access to improved sanitation, sufficient living area, and durability of housing.

In Bangladesh urban dwellers currently account for 38% of the population and are expected to exceed 50% by 2030; furthermore, 47% of the urban population lives in slums, where residents are at increased risk for waterborne diseases, including cholera<sup>2,3</sup>. Cholera is a major cause of morbidity and mortality in Bangladesh<sup>4</sup>. Previously thought to be a rural disease in Bangladesh, cholera is now becoming a disease of cities and slums where living conditions create different challenges for cholera control from those encountered in rural settings<sup>5</sup>. Lessons learned from rural areas, and particularly in epidemic situations, may not be applicable to the changing pattern of cholera endemicity in urban areas. Specific studies on how endemic cholera can be controlled in these urban slums are needed.

Exacerbating the urban cholera situation further is the role of climate change. Rising temperatures and increased precipitation associated with climate change are significant

1  
2  
3  
4 predictors of cholera incidence, with strong evidence in studies of Bangladesh where warmer,  
5 wetter conditions are associated with major cholera outbreaks <sup>6</sup>. Climate change effects in urban  
6 areas have added negative implications for water quality, and studies have found that increased  
7 rainfall intensity combined with impervious urban surfaces are significant predictors of sewer  
8 overflows that greatly impact water quality <sup>7,8</sup>.

9  
10  
11  
12  
13 Improvements of water quality, sanitation, and hygiene (WASH) and oral cholera  
14 vaccine (OCV) are the major tools for the prevention of endemic cholera, including in urban  
15 slums. However, while WASH interventions are frequently employed to control cholera,  
16 evidence regarding their effectiveness is inconsistent and successful implementation may be  
17 stymied by limited cultural acceptability, low uptake, and poor community acceptance <sup>9, 10, 11, 12</sup>.  
18 Our cluster, randomized trial (CRT) of OCV and WASH in an urban Dhaka slum, which failed  
19 to demonstrate that WASH added to protection against severe cholera by OCV, is illustrative <sup>13</sup>.

20  
21  
22  
23  
24  
25  
26  
27 In this re-analysis of the CRT, we followed households in the ‘non-intervention’ arm to  
28 investigate how existing WASH practices and adaptations in the slums may be associated with  
29 lower severe cholera risk. We assessed long-term severe cholera risk over four years and sought  
30 to identify the salutary practices that might inform the development of future effective,  
31 acceptable, and sustainable WASH interventions in cholera-endemic urban populations.

## 32 33 34 35 36 37 38 **Methods**

### 39 40 Trial and Population

41  
42 In 2011, the International Centre for Diarrheal Disease Research, Bangladesh (icddr,b)  
43 conducted a cluster randomized control trial entitled ‘Introduction of cholera vaccine in  
44 Bangladesh (ICVB)’<sup>13</sup> in six selected wards of Mirpur, Dhaka to evaluate the feasibility and  
45 effectiveness of oral cholera vaccine (OCV), both deployed alone and in conjunction with  
46 WASH interventions. Vaccination with Shanchol, a two-dose OCV was carried out between 17  
47 February and 6 April, 2011.

48  
49  
50  
51  
52  
53  
54  
55  
56  
57  
58  
59  
60  
Households were grouped into 90 geographic clusters with an average population of  
2988 households per cluster (ranging from 2288 to 4299 households per cluster). Clusters were

1  
2  
3  
4 randomly assigned (1:1:1) to one of three arms: a two-dose regimen of OCV alone, OCV with a  
5 WASH intervention, or no intervention (control)<sup>13</sup>. The two doses of OCV were administered at  
6 a 14-day interval. The WASH intervention consisted of a behavioral change intervention which  
7 focused on use of a household handwashing station and a chlorine dispenser for the treatment of  
8 household drinking water<sup>13</sup>. Healthy, non-pregnant individuals aged one year or older were  
9 eligible for vaccination in this cluster randomized trial (CRT), and each cluster was separated  
10 from the adjoining cluster by at least a 30-meter buffer area to minimize diffusion of the WASH  
11 messages between clusters.  
12  
13  
14  
15  
16  
17  
18  
19  
20

### 21 Demographic Surveillance

22  
23 The study population was characterized with a baseline demographic census and  
24 recurring census updates to surveil births, deaths, and migrations in the community. The  
25 baseline demographic census was conducted before the start of the ICVB vaccination campaign  
26 and updated bi-annually. Verbal consent for participation in the surveillance was obtained and  
27 documented in a questionnaire at the time of the baseline census and at each bi-annual update. A  
28 “household” was defined as persons sharing the same cooking pot.  
29  
30  
31  
32  
33

34 In addition to the basic demographic information, household-level socioeconomic status,  
35 WASH data, and geographical locations of each household were collected during the baseline  
36 census. For households that were not present at the baseline census, WASH characteristics were  
37 assessed at the first bi-annual census update they were captured in. Household WASH  
38 characteristics were not re-assessed for new births in a household already characterized during  
39 the study period. All individuals living in the study area were provided with a study  
40 identification card containing the unique participant identification (PID) number that was  
41 recorded in computerized study databases.  
42  
43  
44  
45  
46  
47  
48  
49  
50

### 51 Disease Surveillance

52  
53 Surveillance for cholera was conducted between April 2011 to November 2015 at two  
54 icddr,b hospitals and ten hospitals serving the study area shown in Figure 1. Study surveillance  
55  
56  
57  
58  
59  
60

1  
2  
3  
4 staff were present at each health facility throughout the day to facilitate reporting of diarrheal  
5 cases from the study area. Patients from the study area were identified in the treatment centers  
6 with their study identification card or by searching their identities in on-site computerized census  
7 database. Clinical examination was carried out by physicians, and designated study staff  
8 completed data forms and obtained fecal specimens after obtaining written informed consent.  
9  
10  
11  
12

13 A diarrheal visit was defined as having 3 or more loose stools or, 1-2 or an indeterminate  
14 number of loose stools with evidence of dehydration, in the 24 hours before presentation<sup>13</sup>. If the  
15 date of discharge from an earlier diarrheal visit and the date of symptom onset for the subsequent  
16 diarrheal visit were within 7 days of one another, then both visits were considered part of the  
17 same diarrheal episode. The onset of a diarrheal episode was defined as starting on the day the  
18 patient first reported loose or liquid stools.  
19  
20  
21  
22  
23  
24

25 Fecal samples were examined for *V. cholerae* O1 or O139 serogroups, biotype, and Inaba  
26 and Ogawa serotypes using conventional methods<sup>13</sup>. A cholera episode was defined as a  
27 diarrheal episode in which a fecal specimen yielded *V. cholerae* O1 or O139, with no passage of  
28 bloody stools during the episode. Severely dehydrating cholera was defined by the presence of at  
29 least two of the following symptoms or signs of severe dehydration: sunken eyes, dry tongue,  
30 thirst, irritable condition, less active than usual along with inability to drink, skin pinch goes  
31 back slowly, and low volume of radial pulse<sup>13</sup>. A severe cholera episode was one in which the  
32 patient exhibited severe dehydration during any visit of the episode. The primary outcome in this  
33 analysis was the first severe cholera episode detected during follow-up.  
34  
35  
36  
37  
38  
39  
40  
41  
42  
43

#### 44 Patient and Public Involvement

45  
46 This analysis utilizes data that originates from the ICVB cluster randomized trial  
47 conducted by the icddr,b in 2011. Given that ten years have passed since the original study, the  
48 participants were not directly involved in developing or informing the design of the analysis  
49 described in this paper. That said, the original ICVB trial involved strong social mobilization and  
50 community engagement to improve the conduct of the study.  
51  
52  
53  
54  
55  
56  
57  
58  
59  
60



1  
2  
3  
4 The research questions addressed in the ICVB cluster randomized trial were developed  
5 due to the pressing need to understand the impact of oral cholera vaccines in urban Bangladesh.  
6  
7 Advocacy meetings with local government representatives, pediatric associations, and NGOs  
8  
9 were held in order to inform the design and conduct of the ICVB trial.  
10

## 11 12 13 **Analytical Approach**

### 14 15 *Population Under Follow-up*

16  
17 We considered a dynamic population for this analysis, which included the population  
18 present in the non-intervention arm at baseline and new entrants into the non-intervention study  
19 area during the study period. For those present at baseline, the start of follow-up was defined as  
20 the median date of first Shanchol dose in the nearest intervention cluster. For new residents, the  
21 start of follow up was defined as either the date of birth or the date of migration into the study area.  
22  
23 The end of follow-up was defined as either the end of surveillance, 4-years after baseline; date of  
24 death; date of migration out of the cluster; or onset date of first severe cholera episode, whichever  
25 came first. Person-years of observation (PYO) were calculated from the sum of follow up periods  
26 for individuals under analysis.  
27  
28  
29  
30  
31  
32  
33

### 34 35 36 *Selection of WASH variables for analyses*

37  
38 We first examined the ten household WASH variables ascertained in the demographic  
39 censuses and categorized each variable (shared toilet, drinking water source, distance to source  
40 of drinking water, drinking water treatment, toilet type, water availability, waste disposal  
41 location, hand washing water available, hand washing soap available, and shared kitchen into  
42 two categories: “Better” versus “Not Better”. The categorization of WASH variables was based  
43  
44 on local context-informed judgement and the distribution of the study population into categories  
45 of the WASH variables, but without prior information on cholera incidence rates associated with  
46 each variable category.  
47  
48  
49  
50  
51  
52

53  
54 We randomly divided the population of clusters of the “non-intervention arm” of the trial  
55 into two subpopulations– 50% of the households into a “training” population and the other 50%  
56  
57  
58  
59

1  
2  
3  
4 into a “validation” population. The training population was used to develop a recursive  
5  
6 partitioning tree to define the composite WASH variable, and the validation population was  
7  
8 subsequently used to cross-validate the decision tree rule. We considered WASH variables  
9  
10 associated with risk of severe cholera using a Cox proportional hazard regression model at  $p$ -  
11  
12 value  $<0.2$  using the training population. We verified that each selected independent variable  
13  
14 fulfilled proportionality assumptions before inclusion into the model.  
15

### 16 17 *Construction of decision tree to develop composite WASH variable*

18  
19 We developed a composite rule for existing “Better” *versus* “Not Better” household  
20  
21 WASH through a machine learning approach, recursive partitioning, to measure the association  
22  
23 between WASH status and the incidence of severe cholera up to four years of follow-up. To  
24  
25 create a single, binary composite WASH variable predicting the occurrence of severe cholera, we  
26  
27 considered variables that were associated with severe cholera in bivariate analyses.<sup>15</sup>  
28

29  
30 Given relatively few endpoints compared to the total number of individuals followed, we  
31  
32 accounted for the imbalanced case distribution during construction of the decision tree. The  
33  
34 decision tree was designed by assuming a 1:670 loss function for the cost of false positive and  
35  
36 false negative classification, and by defining 300 as the minimum number of observations  
37  
38 required in each terminal node. The number of cross-validations was 10. We ran the algorithm  
39  
40 with the training subpopulation and subsequently pruned the tree by the minimal complexity  
41  
42 parameter, corresponding to a minimum error with at least two terminal nodes to determine the  
43  
44 optimal decision rule for predicting severe cholera.

45  
46 With the selected tree, a receiver operating characteristic (ROC) curve was constructed  
47  
48 in the training population to find the optimal cut-off probability of the composite WASH variable  
49  
50 for predicting severe cholera<sup>16,17</sup>. This threshold was used to create a composite WASH variable  
51  
52 with two categories, one for “Better” household WASH associated with a lower probability of  
53  
54 developing severe cholera in household members, and the other for “Not Better” household  
55  
56 WASH, associated with a higher probability of developing severe cholera. We then evaluated the  
57  
58  
59  
60

1  
2  
3  
4 dichotomous WASH variable in an independent validation population to confirm that the  
5 prediction rule exhibited similar sensitivity and specificity for severe cholera in both populations.  
6  
7

### 8 9 *Protective association between WASH and severe cholera*

10  
11 Next, we measured the association between “Better” WASH household status and severe  
12 cholera in the entire population residing in non-intervention clusters. To evaluate this  
13 association, we analyzed the time from start of follow-up to the first severe cholera case using  
14 the Cox proportional hazard regression model.  
15  
16

17  
18 The model was adjusted for potential confounding covariates, including age in years at  
19 start of follow-up, sex, and variables reflecting household socioeconomic status: monthly  
20 expenditure, house ownership, house having one room, and house wall constructed by  
21 brick/cement. We introduced variables into the model by mixed stepwise selection, using a  
22 combination of forward and backward selection with the cutoff  $p$ -value of 0.1 for both  
23 elimination and retention. Hazard ratios (HR) for severe cholera were estimated by  
24 exponentiating the coefficient for the composite WASH variable in models and protection was  
25 estimated as  $[(1 - HR) \times 100\%]$  with 95% confidence intervals. Estimates were also adjusted for  
26 design effect of cluster randomization of the study clusters.  
27  
28

29  
30 To determine cluster-level “Better” WASH coverage, the person-years of observation of  
31 household members living in “Better” WASH households in the cluster were divided by the  
32 person-years of the entire population in the same cluster. The association between cluster-level  
33 WASH coverage and incidence of severe cholera was assessed after adjustment for the same  
34 potential confounding variables in proportional hazard models using the same approach.  
35  
36

37  
38 Statistical analyses were performed using R Studio analytical software for decision tree  
39 modeling (rpart package), tree plotting (rpart.plot package), and ROC curve illustration (pROC  
40 package). Other statistical analyses were performed using SAS version 9.4. All  $p$ -values were  
41 two-sided.  
42  
43  
44  
45

## 46 47 48 49 50 51 52 53 54 55 **Results**

### *Training and validation subpopulations*

A total of 193,576 individuals in the non-intervention ICVB arm were included in the analysis, as shown in the CONSORT diagram in Figure 2. Of those, 80,720 individuals were present at baseline and 112,856 individuals were new entrants (107,381 in-migration individuals, 5,475 births). During the four-years of follow-up, a total of 292 severe cholera episodes were observed. The training set was composed of 96,943 individuals, 144 of whom developed severe cholera. The validation set was composed of 96,633 individuals, 148 of whom developed severe cholera. As shown in Table 1, baseline characteristics of the training and validation subpopulations were broadly comparable in terms of mean age, sex ratio, average monthly household expenditure, and other household characteristics.

### *Rule development for composite WASH variable predicting severe cholera*

A bivariate analysis for each variable in the training population was performed to measure associations of individual WASH-related variables with the risk of severe cholera (Table 2). Drinking water source (51% reduction of risk; 95% CI: -20-80), distance to source of drinking water (39% reduction of risk ; 95% CI: 14-57) and drinking water treatment (36% reduction of risk; 95% CI: 11-54) were selected to determine the composite binary WASH variable. The resulting tree, shown in Figure 3, found that treatment of drinking water was the dominant bifurcation; regardless of other WASH variables in the tree, not treating drinking water categorized the household as having “Not better” WASH.

### *Performance of the composite WASH variable predicting severe cholera*

In the training set, we found that an optimal cut-off value of 0.0012 for the composite WASH variable maximized the Youden index using the ROC curve, with an area under the curve (AUC) of 59% (95% CI: 55-63) (Figure 4). Under this threshold, the rule predicted 123 true positives of 144 severe cholera episodes, for a sensitivity of 85% (95% CI: 85-86), and 28,709 true negatives among 96,799 persons without severe cholera, yielding a specificity of 30% (95%

1  
2  
3  
4 CI: 22-37). The composite WASH variable performed similarly when applied to the validation  
5 population, with a sensitivity of 82% (95% CI: 82-82) and specificity of 30% (95% CI: 22-37).  
6  
7  
8

9 *Prediction of severe cholera incidence by household WASH status in the total population*

10  
11 We applied the WASH prediction rule to the total population residing in the non-  
12 intervention clusters to predict severe cholera episode risk. 29.7% of households in the non-  
13 intervention arm were classified as having “Better” WASH and the remaining 70.3% were  
14 classified as having “Not Better” WASH.  
15  
16  
17

18  
19 The incidence of severe cholera in all age groups living in the “Better” WASH  
20 households was 57 per 100,000 person-years of observation (PYO), compared to 120 per  
21 100,000 PYO in “Not Better” WASH households, a 47% (95% CI: 29-61,  $p$ -value  $<0.001$ )  
22 reduced risk of severe cholera, after adjusting for covariates. A protective association between  
23 living in a “Better” WASH households and severe cholera risk was seen in all age groups (Table  
24 3). For individuals under the age of 15, living in a “Better” WASH households was associated  
25 with having 64% (95% CI: 36-80;  $p$ -value  $<0.001$ ) reduced risk of severe cholera. The protective  
26 association of “Better” WASH household status was somewhat lower in the 15+ year age-group,  
27 where “Better” WASH was associated with a 43% (95% CI: 16-61;  $p$ -value:  $0.004$ ) reduction in  
28 severe cholera risk.  
29  
30  
31  
32  
33  
34  
35  
36  
37  
38

39 There was a slight, non-significant negative association between rising proportion of  
40 “Better” WASH households in a cluster and incidence rate of severe cholera. In our model, for  
41 every ten percent increase in proportion of “Better” WASH households in a cluster, individuals  
42 living in that cluster experienced 4% lower risk of severe cholera, though this relationship was  
43 not significant (HR=0.996 (95% CI: 0.988-1.005;  $p$ -value:  $0.40$ ).  
44  
45  
46  
47  
48  
49

50 **Discussion**

51  
52 Using a machine learning approach, we developed a composite WASH variable  
53 characterizing households at baseline that predicted the risk of severe cholera risk for four years  
54  
55  
56  
57  
58  
59  
60

1  
2  
3  
4 of follow-up of a cohort in a Dhaka slum. Water quality and access were the most significant  
5 factors associated with severe cholera risk.  
6

7  
8 This finding is consistent with previous literature and findings from Wolfe and  
9 colleagues' systematic review of case-control studies that found strong associations between  
10 household water quality and lowered incidence of cholera.<sup>18</sup> In this review of mostly epidemic  
11 cholera contexts, the authors found that eight WASH-related risk factors, including unimproved  
12 water source, untreated water, unsafe water storage and transport, were consistently associated  
13 with higher odds of cholera. As such, the importance of water practices in our determination of  
14 "Better" WASH is in line with the prevailing understanding of cholera risk. What is new about  
15 our findings is that the protective relationships between household WASH and cholera also  
16 pertain to cholera of life-threatening severity, are sustained for at least four years after initial  
17 characterization of household WASH at baseline, and pertain to a densely populated, poor slum  
18 in which cholera is highly endemic.  
19  
20  
21  
22  
23  
24  
25  
26  
27

28  
29 In our analysis, we found that individuals living in "Better" WASH households had 47%  
30 (95% CI: 29-61) reduced risk of severe cholera compared to individuals living in "Not Better"  
31 WASH households, after adjusting for age, gender, and socioeconomic factors. This statistically  
32 significant protective association was demonstrated in all age groups examined, though those  
33 under-15 exhibited a greater degree of protection compared to those over-15. This difference by  
34 age group may stem from the differences in WASH behaviors and exposure to cholera—wherein  
35 individuals 15 and older are more likely to have many exposures outside of the household at  
36 school, work, or play that could reduce the protective effects of living in a "Better" WASH  
37 home.  
38  
39  
40  
41  
42  
43  
44  
45

46  
47 There are several strengths to our analysis that lend credibility to the findings. The  
48 analysis was evaluated in the context of a prospective CRT in a well-defined population with  
49 comprehensive follow-up for cholera detection. We followed this population for four-years,  
50 making it one of the longest evaluations of the relationship between household WASH and  
51 severe cholera incidence, and thereby shedding light on the long-term durability of WASH  
52 adaptations. Further, during the development of the composite WASH rule we reduced bias by  
53  
54  
55  
56  
57  
58  
59  
60

1  
2  
3  
4 categorizing WASH variables without any prior knowledge of cholera incidence rate associated  
5 with each component category. We also rigorously validated the WASH prediction rule by using  
6 a validation sub-population to ensure that the rule was not over-fitted to the training sub-  
7 population.  
8  
9  
10

11 Our analysis also has limitations. Firstly, household WASH variables were only  
12 evaluated once and applied to the whole study period. As household WASH variables were more  
13 likely to have improved rather than regressed over time due to the overall secular improvement  
14 in socioeconomic conditions in Bangladesh, this misclassification, which would have affected  
15 both households classified at baseline as having “Better” WASH and those classified as having  
16 “Not Better” WASH, would be expected to have led to more conservative estimates of protective  
17 associations with baseline WASH. Secondly, it should be noted that the household WASH  
18 variables included in this study were collected in the context of an OCV trial through a brief  
19 questionnaire designed to assess confounding variables in the evaluation of vaccine  
20 effectiveness. This approach may have led to loss of information, making our estimates of the  
21 WASH-severe cholera relationship conservative, and may also have identified variables that are  
22 “proxies” for actual water-related factors that directly mediate a reduced risk of severe cholera.  
23 Consequently, the WASH variables included in the composite rule may best be interpreted as  
24 *markers* of these direct mediators. Nonetheless, because these variables predicted severe cholera  
25 risk independently of non-WASH socioeconomic factors, the analysis underscores the  
26 importance of water-related WASH adaptations in determining the risk of severe cholera in this  
27 setting. Finally, it might be queried whether the relationship between “Better WASH” in the  
28 household and a lower risk of severe cholera might reflect the possibility that the “Better  
29 WASH” households instituted home-based and clinic-based care for cholera early, and thereby  
30 forestalled progression to severe cholera. We think that this was an unlikely explanation for our  
31 findings because the study population was highly sensitized to home- and clinic-based early  
32 treatment of watery diarrhea, the population had very good access to clinics and hospitals in the  
33 proximities of their homes, and all care for diarrhea at these facilities was low cost or free of  
34 charge. Moreover, in analyses to be published elsewhere, we found that the household WASH  
35  
36  
37  
38  
39  
40  
41  
42  
43  
44  
45  
46  
47  
48  
49  
50  
51  
52  
53  
54  
55  
56  
57  
58  
59  
60

1  
2  
3  
4 prediction rule that we developed for severe cholera also strongly predicted the risk of all  
5 episodes of cholera seen at the treatment centers, regardless of severity.  
6

7 Our findings indicate that there are existing culturally acceptable WASH improvements  
8 that may be impactful in controlling severe cholera in Mirpur, a dense slum population  
9 considered to have hyperendemic cholera. Past experiences in WASH intervention programs  
10 have shown that achieving sustainable and effective WASH interventions can be challenging.  
11 For example, an evaluation of a household water treatment and handwashing campaign in rural  
12 Guatemala found that three years after the intervention there were no differences in handwashing  
13 behavior, WASH conditions, or prevalence of childhood diarrhea in the community<sup>19</sup>. Other  
14 examples of poor long-term uptake and acceptability of WASH interventions are found in  
15 programs implemented in India, Zambia, and Kenya—all highlighting the difficulty of sustained  
16 behavior adoption.<sup>20–22</sup> In light of this, understanding *existing* “Better” WASH households and  
17 behaviors in endemic slum communities can provide valuable lessons on designing feasible and  
18 sustainable WASH interventions.  
19  
20  
21  
22  
23  
24  
25  
26  
27  
28  
29

30 Recent studies have also found that Mirpur, Bangladesh, the site for this study, has very  
31 high rates of microbiological proliferation and contamination in the municipal water supply,<sup>23</sup>  
32 likely due to antiquated and now porous water and sewage pipes, making achievable WASH  
33 improvements paramount to improving community health. Our analysis found that there *are*  
34 existing household water adaptations in Mirpur associated with significantly lowered severe  
35 cholera risk, despite contaminated municipal water. The fact that the WASH adaptations  
36 practiced by 30% of the population were significantly predictive of lower severe cholera risk  
37 even within slum conditions speaks to the potential for existing knowledge to inform cholera  
38 control strategies.  
39  
40  
41  
42  
43  
44  
45  
46  
47

48 Cholera transmission in urban slums may only intensify with the pressures of rapid  
49 urbanization combined with climate change effects. Endemic cholera in urban areas is a reality in  
50 Bangladesh that faces challenges that are different from previously studied epidemic and rural  
51 cholera transmission. Closely examining how some urban households have already made WASH  
52  
53  
54  
55  
56  
57  
58  
59  
60



1  
2  
3  
4 adaptations to reduce cholera risk may help design effective cholera control programs that are  
5 sustainable and achievable in similar settings.  
6  
7

### 8 9 **Data Availability Statement**

10 Data will be made available in a public, open access repository.  
11  
12

### 13 14 **Ethics Statement**

15  
16 This study is a re-analysis of data from a cluster randomized trial entitled 'Introduction of  
17 cholera vaccine in Bangladesh (ICVB)' conducted by the icddr,b in 2011. The ICVB trial  
18 received Institutional Review Board approval (icddr,b protocol number PR#17124) and  
19 Bangladesh National Research Ethics Committee approval. Participants gave informed consent  
20 to participate in the study before taking part.  
21  
22  
23

### 24 25 **Author Contributions**

26  
27 JDC conceptualized the study. SK and FC prepared the original draft. Data analysis was carried  
28 out by JP, FA, and DRK. Additionally JDC, FQ, FM, JHK, and AIK supervised the study. All  
29 authors participated in the writing of the manuscript and interpreting the data. All authors  
30 reviewed and approved the final manuscript.  
31  
32  
33

### 34 35 **Competing Interests**

36  
37 There are no competing interests from any of the authors.  
38  
39  
40

### 41 42 **Funding**

43 This work was supported, in whole or in part, by the Bill & Melinda Gates Foundation [INV  
44 025386]. Under the grant conditions of the Foundation, a Creative Commons Attribution 4.0  
45 Generic License has already been assigned to the Author Accepted Manuscript version that  
46 might arise from this submission.  
47  
48  
49

### 50 51 **Acknowledgement**

52  
53 Icdrr,b is grateful to the Governments of Bangladesh, Canada, Sweden and the UK for providing  
54 unrestricted support. Thanks to Dr. Nigel McMillan (Griffith University) for his scientific and  
55  
56  
57  
58  
59

1  
2  
3  
4 technical support in the manuscript. The funders had no role in study design, data collection and  
5 analysis, decision to publish, or preparation of the manuscript.  
6  
7  
8  
9  
10  
11  
12  
13  
14  
15  
16  
17  
18  
19  
20  
21  
22  
23  
24  
25  
26

## 27 References

- 28 1. Ritchie, H. & Roser, M. Urbanization. *Our World Data* (2018).
- 29 2. Dhaka: fastest growing megacity in the world. *The World from PRX*  
30 <https://www.pri.org/stories/2010-09-08/dhaka-fastest-growing-megacity-world>.  
31
- 32 3. Ross, A. G. P., Zaman, K. & Clemens, J. D. Health Concerns in Urban Slums: A Glimpse of  
33 Things to Come? *JAMA* **321**, 1973–1974 (2019).
- 34 4. Islam, M. T., Clemens, J. D. & Qadri, F. Cholera Control and Prevention in Bangladesh: An  
35 Evaluation of the Situation and Solutions. *J. Infect. Dis.* **218**, S171–S172 (2018).
- 36 5. Longini, I. M., Jr. *et al.* Epidemic and Endemic Cholera Trends over a 33-Year Period in  
37 Bangladesh. *J. Infect. Dis.* **186**, 246–251 (2002).
- 38 6. Asadgol, Z. *et al.* How climate change can affect cholera incidence and prevalence? A  
39 systematic review. *Environ. Sci. Pollut. Res.* **27**, 34906–34926 (2020).
- 40 7. Salerno, F., Gaetano, V. & Gianni, T. Urbanization and climate change impacts on surface  
41 water quality: Enhancing the resilience by reducing impervious surfaces. *Water Res.* **144**,  
42 491–502 (2018).
- 43 8. Kumar, M., Deka, J. P. & Kumari, O. Development of Water Resilience Strategies in the  
44 context of climate change, and rapid urbanization: A discussion on vulnerability mitigation.  
45 *Groundw. Sustain. Dev.* **10**, 100308 (2020).  
46  
47  
48  
49  
50  
51  
52  
53  
54  
55  
56  
57  
58  
59  
60

- 1  
2  
3  
4 9. Taylor, D. L., Kahawita, T. M., Cairncross, S. & Ensink, J. H. J. The Impact of Water,  
5 Sanitation and Hygiene Interventions to Control Cholera: A Systematic Review. *PLOS ONE*  
6 **10**, e0135676 (2015).  
7
- 8  
9 10. George, C. M. *et al.* Randomized Controlled Trial of Hospital-Based Hygiene and Water  
10 Treatment Intervention (CHoBI7) to Reduce Cholera. *Emerg. Infect. Dis.* **22**, 233–241  
11 (2016).  
12
- 13  
14 11. Luby, S. P., Davis, J., Brown, R. R., Gorelick, S. M. & Wong, T. H. F. Broad approaches to  
15 cholera control in Asia: Water, sanitation and handwashing. *Vaccine* **38 Suppl 1**, A110–  
16 A117 (2020).  
17
- 18  
19 12. Childs, L. *et al.* Evaluation of Knowledge and Practices Regarding Cholera, Water  
20 Treatment, Hygiene, and Sanitation Before and After an Oral Cholera Vaccination  
21 Campaign-Haiti, 2013-2014. *Am. J. Trop. Med. Hyg.* **95**, 1305–1313 (2016).  
22
- 23  
24 13. Qadri, F. *et al.* Feasibility and effectiveness of oral cholera vaccine in an urban endemic  
25 setting in Bangladesh: a cluster randomised open-label trial. *The Lancet* **386**, 1362–1371  
26 (2015).  
27
- 28  
29 14. Khan, I. A. *et al.* Organization and implementation of an oral cholera vaccination campaign  
30 in an endemic urban setting in Dhaka, Bangladesh. *Glob. Health Action* **12**, (2019).  
31
- 32  
33 15. Strobl, C., Malley, J. & Tutz, G. An Introduction to Recursive Partitioning: Rationale,  
34 Application and Characteristics of Classification and Regression Trees, Bagging and  
35 Random Forests. *Psychol. Methods* **14**, 323–348 (2009).  
36
- 37  
38 16. Hand, D. J. Measuring classifier performance: a coherent alternative to the area under the  
39 ROC curve. *Mach. Learn.* **77**, 103–123 (2009).  
40
- 41  
42 17. Faraggi, D. & Reiser, B. Estimation of the area under the ROC curve. *Stat. Med.* **21**, 3093–  
43 3106 (2002).  
44
- 45  
46 18. Wolfe, M., Kaur, M., Yates, T., Woodin, M. & Lantagne, D. A Systematic Review and  
47 Meta-Analysis of the Association between Water, Sanitation, and Hygiene Exposures and  
48 Cholera in Case–Control Studies. *Am. J. Trop. Med. Hyg.* **99**, 534–545 (2018).  
49
- 50  
51 19. Arnold, B., Arana, B., Mäusezahl, D., Hubbard, A. & Colford, J. M., Jr. Evaluation of a pre-  
52 existing, 3-year household water treatment and handwashing intervention in rural Guatemala.  
53 *Int. J. Epidemiol.* **38**, 1651–1661 (2009).  
54
- 55  
56 20. Makutsa, P. *et al.* Challenges in Implementing a Point-of-Use Water Quality Intervention in  
57 Rural Kenya. *Am. J. Public Health* **91**, 1571–1573 (2001).  
58  
59  
60

- 1  
2  
3  
4 21. Firth, J. *et al.* Point-of-Use Interventions to Decrease Contamination of Drinking Water: A  
5 Randomized, Controlled Pilot Study on Efficacy, Effectiveness, and Acceptability of Closed  
6 Containers, *Moringa oleifera*, and In-home Chlorination in Rural South India. *Am. J. Trop.*  
7 *Med. Hyg.* **82**, 759–765 (2010).  
8  
9  
10 22. Peletz, R. *et al.* Follow-Up Study to Assess the Use and Performance of Household Filters in  
11 Zambia. *Am. J. Trop. Med. Hyg.* **89**, 1190–1194 (2013).  
12  
13 23. Acharjee, M., Rahman, F., Jahan, F. & Noor, R. Bacterial Proliferation in Municipal Water  
14 Supplied in Mirpur Locality of Dhaka City, Bangladesh: Microbiological Study of Municipal  
15 Water. *CLEAN - Soil Air Water* **42**, 434–441 (2014).  
16  
17  
18  
19  
20  
21  
22  
23  
24  
25  
26  
27  
28  
29  
30  
31  
32  
33  
34  
35  
36  
37  
38  
39  
40  
41  
42  
43  
44  
45  
46  
47  
48  
49  
50  
51  
52  
53  
54  
55  
56  
57  
58  
59  
60

## Figure Legends

Figure 1. Map of ICVB study area and cholera surveillance treatment centers

Figure 2. CONSORT- Dynamic population during 4-year follow up period

Figure 3. Decision rule predicting severe cholera episode risk in the training subpopulation

Figure 4. ROC curve for the performance of the decision rule in the training subpopulation

**Table 1. Baseline characteristics of the total, training, and validation subpopulations**

|                                               | Total Population | Training sub-population | Validation sub-population |
|-----------------------------------------------|------------------|-------------------------|---------------------------|
|                                               | n=193576         | n=96943                 | n=96633                   |
| Age in years - mean (std)                     | 22.9 (15.4)      | 22.9 (15.3)             | 22.9 (15.4)               |
| Gender: Male - n (%)                          | 94008 (48.6)     | 47365 (48.9)            | 46643 (48.3)              |
| Monthly Expenditure <sup>†</sup> – mean (std) | 10288.6 (5374.1) | 10293.1 (4891.7)        | 10284.1 (5817.7)          |
| Ownership: Own house - n (%)                  | 28677 (14.8)     | 14549 (15.0)            | 14128 (14.6)              |
| House: having one room - n (%)                | 165215 (85.3)    | 82427 (85.0)            | 82788 (85.7)              |
| Wall: Brick/Cement - n (%)                    | 139860 (72.3)    | 69880 (72.1)            | 69980 (72.4)              |

\* std: standard deviation; n: number of individuals

<sup>†</sup> expenditure in Bangladeshi takas (BDT)

**Table 2: Bivariate relationship of WASH variables with severe cholera risk in the training subpopulation**

| WASH Variable<br><i>Criteria for Better WASH categorization</i>                         | Better WASH |       |              |                           | Not Better WASH |       |              |                           | Protective association between variable and severe cholera |         |
|-----------------------------------------------------------------------------------------|-------------|-------|--------------|---------------------------|-----------------|-------|--------------|---------------------------|------------------------------------------------------------|---------|
|                                                                                         | n           | Cases | Person-years | IR (95% CI) Per 100000/PY | n               | Cases | Person-years | IR (95% CI) Per 100000/PY | Crude (95%CI)                                              | P-value |
| <b>Shared toilet</b><br><i>No</i>                                                       | 4620        | 9     | 10253        | 88 (46, 169)              | 92323           | 135   | 134076       | 101 (85, 119)             | 21 (-55, 60)                                               | 0.49    |
| <b>Toilet type</b><br><i>Sanitary latrine with or without flush</i>                     | 80974       | 122   | 118747       | 103 (86, 123)             | 15969           | 22    | 25582        | 86 (57, 131)              | -24 (-95, 21)                                              | 0.36    |
| <b>Drinking Water Source:</b><br><i>Own tap/well/pump/bottled or vendor water</i>       | 4187        | 5     | 8993         | 56 (23, 134)              | 92756           | 139   | 135337       | 103 (87, 121)             | 51 (-20, 80)                                               | 0.12    |
| <b>Water availability:</b><br><i>Tap/tube well/well water is available all the time</i> | 67831       | 95    | 93293        | 102 (83, 125)             | 29112           | 49    | 51036        | 96 (73, 127)              | -15 (-64, 19)                                              | 0.43    |
| <b>Distance to source of drinking water</b><br><i>Using median as cut off</i>           | 43806       | 47    | 64461        | 73 (55, 97)               | 53137           | 97    | 79869        | 121 (100, 148)            | 39 (14, 57)                                                | <0.01   |

|                                                                             |       |     |        |               |       |    |       |                |                |       |
|-----------------------------------------------------------------------------|-------|-----|--------|---------------|-------|----|-------|----------------|----------------|-------|
| <b>Drinking Water Treatment:</b><br><i>Filtered/Boiled/chemical treated</i> | 54275 | 60  | 77380  | 78 (60, 100)  | 42668 | 84 | 66950 | 125 (101, 155) | 36 (11, 54)    | <0.01 |
| <b>Waste disposal location:</b> <i>Fixed</i>                                | 80198 | 109 | 116056 | 94 (78, 113)  | 16745 | 35 | 28273 | 124 (89, 172)  | 20 (-17, 46)   | 0.25  |
| <b>Hand Washing Water Available</b> §<br><i>Yes</i>                         | 93758 | 138 | 138159 | 100 (85, 118) | 3185  | 6  | 6170  | 97 (44, 216)   | -11 (-152, 51) | 0.8   |
| <b>Hand Washing Soap Available</b> §<br><i>Yes</i>                          | 91514 | 133 | 135316 | 98 (83, 117)  | 5429  | 11 | 9014  | 122 (68, 220)  | 17 (-54, 55)   | 0.56  |
| <b>Shared kitchen</b><br><i>No</i>                                          | 86713 | 118 | 120182 | 98 (82, 118)  | 10230 | 26 | 24147 | 108 (73, 158)  | -5 (-62, 32)   | 0.83  |

\* IR: incidence rate; n: number of individuals

§ Indicates WASH condition observed directly by study team

**Table 3. Protective association between “Better” WASH and severe cholera risk in the total study population**

| Age at start of follow-up | “Better” WASH |       |              |                            | “Not Better” WASH |       |              |                            | Protective association between “Better” WASH and severe cholera |         |                   |         |
|---------------------------|---------------|-------|--------------|----------------------------|-------------------|-------|--------------|----------------------------|-----------------------------------------------------------------|---------|-------------------|---------|
|                           | n             | Cases | Person-years | IR per 100000/PYs (95% CI) | N                 | Cases | Person-years | IR per 100000/PYs (95% CI) | Crude (95%CI)                                                   | p-value | Adjusted* (95%CI) | p-value |
| < 5 years                 | 7552          | 5     | 10518        | 48 (20, 114)               | 17149             | 42    | 24366        | 172 (127, 233)             | 72 (25, 89)                                                     | 0.012   | 69 (15, 88)       | 0.022   |
| 5-14 years                | 8861          | 4     | 14618        | 27 (10, 73)                | 25318             | 32    | 42389        | 75 (53, 107)               | 63 (6, 85)                                                      | 0.037   | 63 (6, 85)        | 0.037   |
| 15+ years                 | 40983         | 39    | 59680        | 65 (48, 89)                | 93713             | 170   | 136945       | 124 (107, 144)             | 46 (20, 64)                                                     | 0.002   | 43 (16, 61)       | 0.004   |
| All                       | 57396         | 48    | 84817        | 57 (43, 75)                | 136180            | 244   | 203701       | 120 (106, 136)             | 52 (34, 65)                                                     | <0.001  | 47 (29, 61)       | <0.001  |

\* IR: incidence rate; n: number of individuals

\* Adjusted for design effect and selected covariates by stepwise selection using cutoff 0.1 for both of elimination and addition; For entire population, selected covariates were age, gender, home ownership and house having one room; For <5 years, selected covariate was home ownership; For 5-14 years, no covariate was selected; For 15+ years, selected covariates were age, gender and house having one room

1  
2  
3  
4  
5  
6  
7  
8  
9  
10  
11  
12  
13  
14  
15  
16  
17  
18  
19  
20  
21  
22  
23  
24  
25  
26  
27  
28  
29  
30  
31  
32  
33  
34  
35  
36  
37  
38  
39  
40  
41  
42  
43  
44  
45  
46  
47  
48  
49  
50  
51  
52  
53  
54  
55  
56  
57  
58  
59  
60

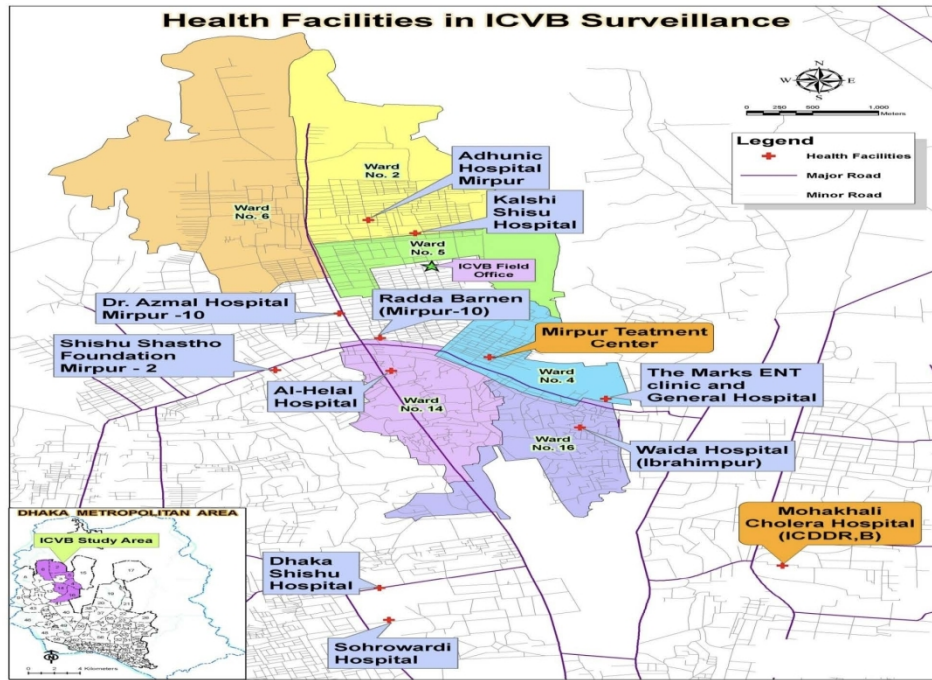

Figure 1. Map of ICVB study area and cholera surveillance treatment centers

221x177mm (237 x 211 DPI)

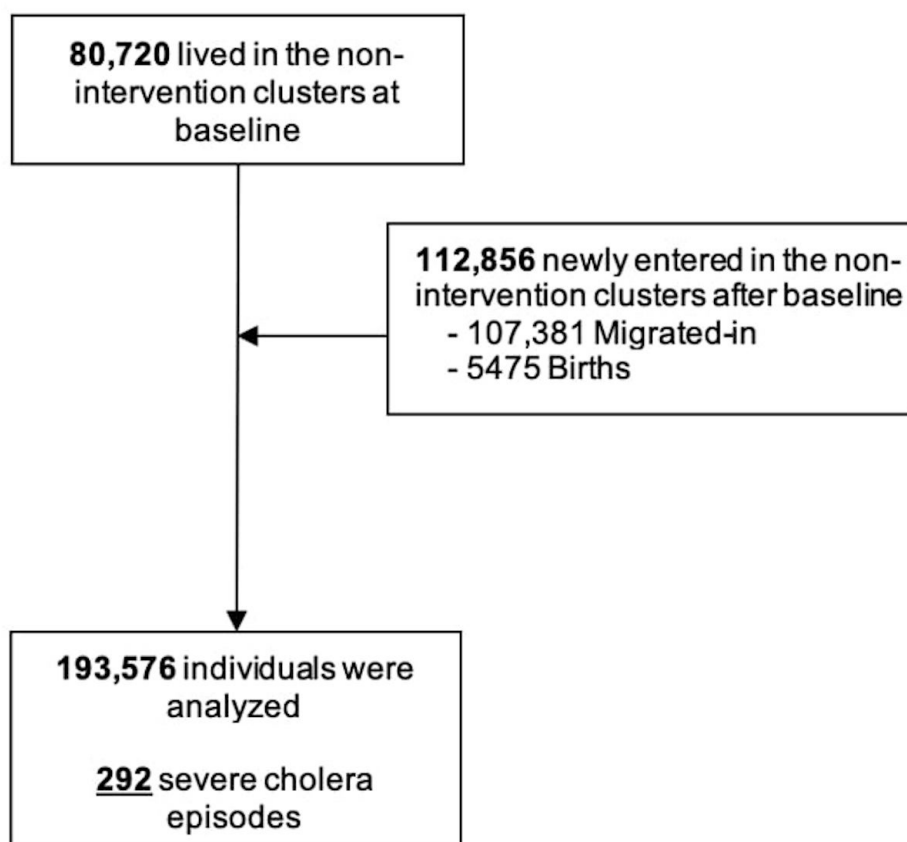

Figure 2. CONSORT- Dynamic population during 4-year follow up period

109x102mm (300 x 300 DPI)



1  
2  
3  
4  
5  
6  
7  
8  
9  
10  
11  
12  
13  
14  
15  
16  
17  
18  
19  
20  
21  
22  
23  
24  
25  
26  
27  
28  
29  
30  
31  
32  
33  
34  
35  
36  
37  
38  
39  
40  
41  
42  
43  
44  
45  
46  
47  
48  
49  
50  
51  
52  
53  
54  
55  
56  
57  
58  
59  
60

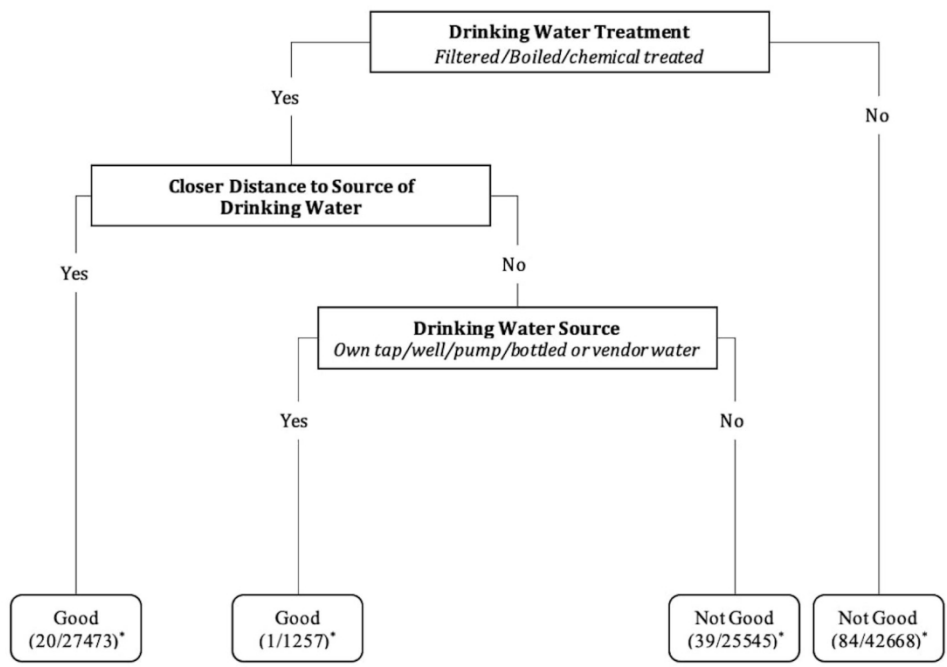

\* Number of severe cholera cases / household population in the training subpopulation

Figure 3. Decision rule predicting severe cholera episode risk in the training subpopulation

150x115mm (300 x 300 DPI)



AUC = 59% (95% CI, 55-63); optimal cut-off probability using the Youden index = 0.0012

Figure 4. ROC curve for the performance of the decision rule in the training subpopulation

180x100mm (300 x 300 DPI)

STROBE Statement—Checklist of items that should be included in reports of *cohort studies*

|                           | Item No | Recommendation                                                                                                                                                                                                                                                                                                         | Page No                       |
|---------------------------|---------|------------------------------------------------------------------------------------------------------------------------------------------------------------------------------------------------------------------------------------------------------------------------------------------------------------------------|-------------------------------|
| <b>Title and abstract</b> | 1       | (a) Indicate the study's design with a commonly used term in the title or the abstract                                                                                                                                                                                                                                 | 1                             |
|                           |         | (b) Provide in the abstract an informative and balanced summary of what was done and what was found                                                                                                                                                                                                                    | 2                             |
| <b>Introduction</b>       |         |                                                                                                                                                                                                                                                                                                                        |                               |
| Background/rationale      | 2       | Explain the scientific background and rationale for the investigation being reported                                                                                                                                                                                                                                   | 4                             |
| Objectives                | 3       | State specific objectives, including any prespecified hypotheses                                                                                                                                                                                                                                                       | 4                             |
| <b>Methods</b>            |         |                                                                                                                                                                                                                                                                                                                        |                               |
| Study design              | 4       | Present key elements of study design early in the paper                                                                                                                                                                                                                                                                | 1-2                           |
| Setting                   | 5       | Describe the setting, locations, and relevant dates, including periods of recruitment, exposure, follow-up, and data collection                                                                                                                                                                                        | 2, 4-5                        |
| Participants              | 6       | (a) Give the eligibility criteria, and the sources and methods of selection of participants. Describe methods of follow-up<br>(b) For matched studies, give matching criteria and number of exposed and unexposed                                                                                                      | 5-6<br>N/A                    |
| Variables                 | 7       | Clearly define all outcomes, exposures, predictors, potential confounders, and effect modifiers. Give diagnostic criteria, if applicable                                                                                                                                                                               | 5-6                           |
| Data sources/measurement  | 8*      | For each variable of interest, give sources of data and details of methods of assessment (measurement). Describe comparability of assessment methods if there is more than one group                                                                                                                                   | 5-7                           |
| Bias                      | 9       | Describe any efforts to address potential sources of bias                                                                                                                                                                                                                                                              | 6-7                           |
| Study size                | 10      | Explain how the study size was arrived at                                                                                                                                                                                                                                                                              | N/A                           |
| Quantitative variables    | 11      | Explain how quantitative variables were handled in the analyses. If applicable, describe which groupings were chosen and why                                                                                                                                                                                           | 6-7                           |
| Statistical methods       | 12      | (a) Describe all statistical methods, including those used to control for confounding<br>(b) Describe any methods used to examine subgroups and interactions<br>(c) Explain how missing data were addressed<br>(d) If applicable, explain how loss to follow-up was addressed<br>(e) Describe any sensitivity analyses | 6-8<br>6-8<br>N/A<br>6<br>N/A |
| <b>Results</b>            |         |                                                                                                                                                                                                                                                                                                                        |                               |
| Participants              | 13*     | (a) Report numbers of individuals at each stage of study—eg numbers potentially eligible, examined for eligibility, confirmed eligible, included in the study, completing follow-up, and analysed<br>(b) Give reasons for non-participation at each stage<br>(c) Consider use of a flow diagram                        | 8<br>N/A<br>12                |
| Descriptive data          | 14*     | (a) Give characteristics of study participants (eg demographic, clinical, social) and information on exposures and potential confounders<br>(b) Indicate number of participants with missing data for each variable of interest<br>(c) Summarise follow-up time (eg, average and total amount)                         | 13<br>N/A<br>8                |
| Outcome data              | 15*     | Report numbers of outcome events or summary measures over time                                                                                                                                                                                                                                                         | 8                             |

|    |                          |    |                                                                                                                                                                                                              |       |
|----|--------------------------|----|--------------------------------------------------------------------------------------------------------------------------------------------------------------------------------------------------------------|-------|
| 1  | Main results             | 16 | (a) Give unadjusted estimates and, if applicable, confounder-adjusted estimates and their precision (eg, 95% confidence interval). Make clear which confounders were adjusted for and why they were included | 9     |
| 2  |                          |    | (b) Report category boundaries when continuous variables were categorized                                                                                                                                    | N/A   |
| 3  |                          |    | (c) If relevant, consider translating estimates of relative risk into absolute risk for a meaningful time period                                                                                             | N/A   |
| 4  |                          |    |                                                                                                                                                                                                              |       |
| 5  |                          |    |                                                                                                                                                                                                              |       |
| 6  |                          |    |                                                                                                                                                                                                              |       |
| 7  |                          |    |                                                                                                                                                                                                              |       |
| 8  |                          |    |                                                                                                                                                                                                              |       |
| 9  | Other analyses           | 17 | Report other analyses done—eg analyses of subgroups and interactions, and sensitivity analyses                                                                                                               | 11    |
| 10 |                          |    |                                                                                                                                                                                                              |       |
| 11 | <b>Discussion</b>        |    |                                                                                                                                                                                                              |       |
| 12 |                          |    |                                                                                                                                                                                                              |       |
| 13 | Key results              | 18 | Summarise key results with reference to study objectives                                                                                                                                                     | 10    |
| 14 | Limitations              | 19 | Discuss limitations of the study, taking into account sources of potential bias or imprecision. Discuss both direction and magnitude of any potential bias                                                   | 12    |
| 15 |                          |    |                                                                                                                                                                                                              |       |
| 16 | Interpretation           | 20 | Give a cautious overall interpretation of results considering objectives, limitations, multiplicity of analyses, results from similar studies, and other relevant evidence                                   | 11-13 |
| 17 |                          |    |                                                                                                                                                                                                              |       |
| 18 |                          |    |                                                                                                                                                                                                              |       |
| 19 | Generalisability         | 21 | Discuss the generalisability (external validity) of the study results                                                                                                                                        | 12-13 |
| 20 |                          |    |                                                                                                                                                                                                              |       |
| 21 | <b>Other information</b> |    |                                                                                                                                                                                                              |       |
| 22 |                          |    |                                                                                                                                                                                                              |       |
| 23 | Funding                  | 22 | Give the source of funding and the role of the funders for the present study and, if applicable, for the original study on which the present article is based                                                | 13    |
| 24 |                          |    |                                                                                                                                                                                                              |       |
| 25 |                          |    |                                                                                                                                                                                                              |       |

\*Give information separately for exposed and unexposed groups.

**Note:** An Explanation and Elaboration article discusses each checklist item and gives methodological background and published examples of transparent reporting. The STROBE checklist is best used in conjunction with this article (freely available on the Web sites of PLoS Medicine at <http://www.plosmedicine.org/>, Annals of Internal Medicine at <http://www.annals.org/>, and Epidemiology at <http://www.epidem.com/>). Information on the STROBE Initiative is available at <http://www.strobe-statement.org>.

# BMJ Open

## Are better existing WASH practices in urban slums associated with a lower long-term risk of severe cholera? A prospective cohort study with four years of follow-up in Mirpur, Bangladesh

|                               |                                                                                                                                                                                                                                                                                                                                                                                                                                                                                                                                                                                                                                                                                                                                                                                                                                                                                                                                                                                                                                                                                                                                                                                                                                                                                                                                                                                                                                                                                                                                                                                                                                                                                                                                                                                                                                                                                                  |
|-------------------------------|--------------------------------------------------------------------------------------------------------------------------------------------------------------------------------------------------------------------------------------------------------------------------------------------------------------------------------------------------------------------------------------------------------------------------------------------------------------------------------------------------------------------------------------------------------------------------------------------------------------------------------------------------------------------------------------------------------------------------------------------------------------------------------------------------------------------------------------------------------------------------------------------------------------------------------------------------------------------------------------------------------------------------------------------------------------------------------------------------------------------------------------------------------------------------------------------------------------------------------------------------------------------------------------------------------------------------------------------------------------------------------------------------------------------------------------------------------------------------------------------------------------------------------------------------------------------------------------------------------------------------------------------------------------------------------------------------------------------------------------------------------------------------------------------------------------------------------------------------------------------------------------------------|
| Journal:                      | <i>BMJ Open</i>                                                                                                                                                                                                                                                                                                                                                                                                                                                                                                                                                                                                                                                                                                                                                                                                                                                                                                                                                                                                                                                                                                                                                                                                                                                                                                                                                                                                                                                                                                                                                                                                                                                                                                                                                                                                                                                                                  |
| Manuscript ID                 | bmjopen-2022-060858.R2                                                                                                                                                                                                                                                                                                                                                                                                                                                                                                                                                                                                                                                                                                                                                                                                                                                                                                                                                                                                                                                                                                                                                                                                                                                                                                                                                                                                                                                                                                                                                                                                                                                                                                                                                                                                                                                                           |
| Article Type:                 | Original research                                                                                                                                                                                                                                                                                                                                                                                                                                                                                                                                                                                                                                                                                                                                                                                                                                                                                                                                                                                                                                                                                                                                                                                                                                                                                                                                                                                                                                                                                                                                                                                                                                                                                                                                                                                                                                                                                |
| Date Submitted by the Author: | 23-Aug-2022                                                                                                                                                                                                                                                                                                                                                                                                                                                                                                                                                                                                                                                                                                                                                                                                                                                                                                                                                                                                                                                                                                                                                                                                                                                                                                                                                                                                                                                                                                                                                                                                                                                                                                                                                                                                                                                                                      |
| Complete List of Authors:     | <p>Kang, Sophie; International Vaccine Institute, Epidemiology, Public Health, and Impact Unit<br/> Chowdhury, Fahima; International Centre for Diarrhoeal Disease Research Bangladesh; Griffith University Menzies Health Institute Queensland<br/> Park, Juyeon; International Vaccine Institute, Epidemiology, Public Health, and Impact Unit; University of Cambridge, Department of Medicine<br/> Ahmed, Tasnuva; International Centre for Diarrhoeal Disease Research Bangladesh<br/> Tadesse, Birkneh Tilahun; International Vaccine Institute, Epidemiology, Public Health, and Impact Unit<br/> Islam, Md. Taufiqul; International Centre for Diarrhoeal Disease Research Bangladesh<br/> Kim, Deok Ryun; International Vaccine Institute, Epidemiology, Public Health, and Impact Unit<br/> Im, Justin; International Vaccine Institute<br/> Aziz, Asma; International Vaccine Institute, Epidemiology, Public Health, and Impact Unit<br/> Hoque, Masuma; International Centre for Diarrhoeal Disease Research Bangladesh<br/> Pak, GiDeok; International Vaccine Institute<br/> Khanam, Farhana; International Centre for Diarrhoeal Disease Research Bangladesh<br/> Ahmmed, Faisal; International Centre for Diarrhoeal Disease Research Bangladesh<br/> Liu , Xinxue ; University of Oxford Oxford Vaccine Group<br/> Zaman, K; International Centre for Diarrhoeal Disease Research Bangladesh<br/> Khan, Ashraf Islam; International Centre for Diarrhoeal Disease Research<br/> Kim, Jerome ; International Vaccine Institute<br/> Marks, Florian ; International Vaccine Institute; University of Cambridge, Department of Medicine<br/> Qadri, Firdausi ; International Centre for Diarrhoeal Disease Research Bangladesh<br/> Clemens, John; International Vaccine Institute, Epidemiology, Public Health, and Impact Unit; International Centre for Diarrhoeal Disease</p> |

1  
2  
3  
4  
5  
6  
7  
8  
9  
10  
11  
12  
13  
14  
15  
16  
17  
18  
19  
20  
21  
22  
23  
24  
25  
26  
27  
28  
29  
30  
31  
32  
33  
34  
35  
36  
37  
38  
39  
40  
41  
42  
43  
44  
45  
46  
47  
48  
49  
50  
51  
52  
53  
54  
55  
56  
57  
58  
59  
60

|                                    |                                                                                      |
|------------------------------------|--------------------------------------------------------------------------------------|
|                                    | Research Bangladesh                                                                  |
| <b>Primary Subject Heading</b> :   | Global health                                                                        |
| <b>Secondary Subject Heading</b> : | Epidemiology, Infectious diseases, Public health                                     |
| <b>Keywords</b> :                  | EPIDEMIOLOGY, Epidemiology < INFECTIOUS DISEASES, INFECTIOUS DISEASES, PUBLIC HEALTH |
|                                    |                                                                                      |





I, the Submitting Author has the right to grant and does grant on behalf of all authors of the Work (as defined in the below author licence), an exclusive licence and/or a non-exclusive licence for contributions from authors who are: i) UK Crown employees; ii) where BMJ has agreed a CC-BY licence shall apply, and/or iii) in accordance with the terms applicable for US Federal Government officers or employees acting as part of their official duties; on a worldwide, perpetual, irrevocable, royalty-free basis to BMJ Publishing Group Ltd ("BMJ") its licensees and where the relevant Journal is co-owned by BMJ to the co-owners of the Journal, to publish the Work in this journal and any other BMJ products and to exploit all rights, as set out in our [licence](#).

The Submitting Author accepts and understands that any supply made under these terms is made by BMJ to the Submitting Author unless you are acting as an employee on behalf of your employer or a postgraduate student of an affiliated institution which is paying any applicable article publishing charge ("APC") for Open Access articles. Where the Submitting Author wishes to make the Work available on an Open Access basis (and intends to pay the relevant APC), the terms of reuse of such Open Access shall be governed by a Creative Commons licence – details of these licences and which [Creative Commons](#) licence will apply to this Work are set out in our licence referred to above.

Other than as permitted in any relevant BMJ Author's Self Archiving Policies, I confirm this Work has not been accepted for publication elsewhere, is not being considered for publication elsewhere and does not duplicate material already published. I confirm all authors consent to publication of this Work and authorise the granting of this licence.

1  
2  
3  
4 **Are better existing WASH practices in urban slums associated with a lower long-**  
5 **term risk of severe cholera? A prospective cohort study with four years of follow-**  
6 **up in Mirpur, Bangladesh**  
7  
8  
9

10  
11 Sophie Kang<sup>1\*</sup>, Fahima Chowdhury<sup>2,7\*</sup>, Juyeon Park<sup>1,4</sup>, Tasnuva Ahmed<sup>2</sup>,  
12 Birkneh Tilahun Tadesse<sup>1</sup>, Md. Taufiqul Islam<sup>2</sup>, Deok Ryun Kim<sup>1</sup>, Justin Im<sup>1</sup>,  
13 Asma Binte Aziz<sup>1</sup>, Masuma Hoque<sup>2</sup>, Gideok Pak<sup>1</sup>, Farhana Khanam<sup>2</sup>, Faisal  
14 Ahmmed<sup>2</sup>, Xinxue Liu<sup>3</sup>, Khalequ Zaman<sup>2</sup>, Ashraful Islam Khan<sup>2</sup>, Jerome H. Kim<sup>1</sup>, Florian  
15 Marks<sup>1,4,5</sup>, Firdausi Qadri<sup>2</sup>, John D. Clemens<sup>1,2,6</sup>  
16  
17  
18  
19  
20

21 1 International Vaccine Institute, Seoul, Republic of Korea  
22

23 2 International Centre for Diarrheal Disease Research, Bangladesh, Dhaka, Bangladesh  
24

25 3 Oxford Vaccine Group, Department of Pediatrics, University of Oxford, Oxford OX3 9DU,  
26  
27

28 UK  
29

30 4 Department of Medicine, University of Cambridge, Cambridge, United Kingdom  
31

32 5 University of Antananarivo, Antananarivo, Madagascar  
33

34 6 UCLA Fielding School of Public Health, Los Angeles, CA 90095-1772, USA  
35

36 7 Menzies Health Institute Queensland, Griffith University, Gold Coast, Australia  
37  
38

39 \* Contributed equally  
40  
41  
42  
43

44 Correspondence to Sophie Kang, International Vaccine Institute; Sophie.kang@ivi.int  
45  
46  
47  
48  
49  
50  
51  
52  
53  
54  
55  
56  
57  
58  
59  
60



## Abstract

### Objective

To investigate the association between existing household WASH practices and severe cholera risk in a dense urban slum where cholera is highly endemic.

### Design, Setting, and Participants

We assembled a large prospective cohort within a cluster randomized trial evaluating the effectiveness of oral cholera vaccine. Our dynamic cohort population (n=193,576) comprised individuals living in the “non-intervention” clusters of the trial, and were followed over four years. This study was conducted in a dense urban slum community of Dhaka, Bangladesh and cholera surveillance was undertaken in twelve hospitals serving the study area.

### Primary outcome measure

First severe cholera episode detected during follow-up period.

### Methods

1  
2  
3  
4 We applied a machine learning algorithm on a training subpopulation (n=96,943) to develop a  
5 binary (“Better”, “Not Better”) composite WASH variable predictive of severe cholera. The  
6 WASH rule was evaluated for performance in a separate validation subpopulation (n=96,633).  
7  
8 Afterwards, we used Cox-regression models to evaluate the association between “Better” WASH  
9 households and severe cholera risk over 4 years in the entire study population.  
10  
11  
12

### 13 Results

14  
15 The “Better” WASH rule found that water quality and access were the most significant factors  
16 associated with severe cholera risk. Members of “Better” WASH households, constituting one-  
17 third of the population, had a 47% reduced risk of severe cholera (95% CI: 29-69; *p*-value  
18 <0.001), after adjusting for covariates. The protective association between living in a “Better”  
19 WASH household and severe cholera persisted in all age groups.  
20  
21  
22  
23  
24

### 25 Conclusions

26 Salutory existing household WASH practices were associated with a significantly reduced long-  
27 term risk of severe cholera in an urban slum of Dhaka. These findings suggest that WASH  
28 adaptations already practiced in the community may be important for developing and  
29 implementing effective and sustainable cholera control programs in similar settings.  
30  
31  
32  
33  
34  
35  
36  
37  
38  
39  
40  
41  
42  
43  
44  
45  
46  
47  
48  
49  
50  
51

### 52 **Strengths and limitations of this study**

53  
54  
55  
56  
57  
58  
59  
60

- We studied a cohort prospectively followed for four years, making this analysis one of the longest uninterrupted evaluations of the relationship between household WASH and endemic cholera.
- The multivariable WASH prediction rule was rigorously validated using a separate sub-population and thus avoided overfitting to the training set.
- We focused on the existing variability of household WASH within a dense slum community to demonstrate that there are salutary practices that may reduce the long-term risk of severe cholera.
- Household WASH factors were only evaluated once, either at baseline or when participants entered the study area, and this status applied to the entire follow-up period .
- The household WASH variables included in this study were collected in the context of an OCV trial and not optimized for describing WASH factors independently.

## Introduction

The developing world has seen a rapid expansion of urban areas due, in part, to influxes into squalid urban slums. With an estimated 55% of the world's population living in urban areas, 1-in-3 of those urban dwellers live in slum households<sup>1</sup>. Slum households are defined as those which lack one or more of the following conditions: access to improved water, access to improved sanitation, sufficient living area, and durability of housing.

In Bangladesh urban dwellers currently account for 38% of the population and are expected to exceed 50% by 2030; furthermore, 47% of the urban population lives in slums, where residents are at increased risk for waterborne diseases, including cholera<sup>2,3</sup>. Cholera is a major cause of morbidity and mortality in Bangladesh<sup>4</sup>. Previously thought to be a rural disease in Bangladesh, cholera is now becoming a disease of cities and slums where living conditions create different challenges for cholera control from those encountered in rural settings<sup>5</sup>. Lessons learned from rural areas, and particularly in epidemic situations, may not be applicable to the changing pattern of cholera endemicity in urban areas. Specific studies on how endemic cholera can be controlled in these urban slums are needed.

Exacerbating the urban cholera situation further is the role of climate change. Rising temperatures and increased precipitation associated with climate change are significant

1  
2  
3  
4 predictors of cholera incidence, with strong evidence in studies of Bangladesh where warmer,  
5 wetter conditions are associated with major cholera outbreaks <sup>6</sup>. Climate change effects in urban  
6 areas have added negative implications for water quality, and studies have found that increased  
7 rainfall intensity combined with impervious urban surfaces are significant predictors of sewer  
8 overflows that greatly impact water quality <sup>7,8</sup>.

9  
10  
11  
12  
13 Improvements of water quality, sanitation, and hygiene (WASH) and oral cholera  
14 vaccine (OCV) are the major tools for the prevention of endemic cholera, including in urban  
15 slums. However, while WASH interventions are frequently employed to control cholera,  
16 evidence regarding their effectiveness is inconsistent and successful implementation may be  
17 stymied by limited cultural acceptability, low uptake, and poor community acceptance <sup>9, 10, 11, 12</sup>.  
18 Our cluster, randomized trial (CRT) of OCV and WASH in an urban Dhaka slum, which failed  
19 to demonstrate that WASH added to protection against severe cholera by OCV, is illustrative <sup>13</sup>.

20  
21  
22  
23  
24  
25  
26  
27 In this re-analysis of the CRT, we followed households in the ‘non-intervention’ arm to  
28 investigate how existing WASH practices and adaptations in the slums may be associated with  
29 lower severe cholera risk. We assessed long-term severe cholera risk over four years and sought  
30 to identify the salutary practices that might inform the development of future effective,  
31 acceptable, and sustainable WASH interventions in cholera-endemic urban populations.  
32  
33  
34  
35  
36  
37

## 38 **Methods**

### 39 Trial and Population

40  
41  
42 In 2011, the International Centre for Diarrheal Disease Research, Bangladesh (icddr,b)  
43 conducted a cluster randomized control trial entitled ‘Introduction of cholera vaccine in  
44 Bangladesh (ICVB)’<sup>13</sup> in six selected wards of Mirpur, Dhaka to evaluate the feasibility and  
45 effectiveness of oral cholera vaccine (OCV), both deployed alone and in conjunction with  
46 WASH interventions. Vaccination with Shanchol, a two-dose OCV was carried out between 17  
47 February and 6 April, 2011.  
48  
49  
50  
51  
52

53  
54 Households were grouped into 90 geographic clusters with an average population of  
55 2988 households per cluster (ranging from 2288 to 4299 households per cluster). Clusters were  
56  
57  
58  
59  
60

1  
2  
3  
4 randomly assigned (1:1:1) to one of three arms: a two-dose regimen of OCV alone, OCV with a  
5 WASH intervention, or no intervention (control)<sup>13</sup>. The two doses of OCV were administered at  
6 a 14-day interval. The WASH intervention consisted of a behavioral change intervention which  
7 focused on use of a household handwashing station and a chlorine dispenser for the treatment of  
8 household drinking water<sup>13</sup>. Healthy, non-pregnant individuals aged one year or older were  
9 eligible for vaccination in this cluster randomized trial (CRT), and each cluster was separated  
10 from the adjoining cluster by at least a 30-meter buffer area to minimize diffusion of the WASH  
11 messages between clusters.  
12  
13  
14  
15  
16  
17  
18  
19  
20

### 21 Demographic Surveillance

22  
23 The study population was characterized with a baseline demographic census and  
24 recurring census updates to surveil births, deaths, and migrations in the community. The  
25 baseline demographic census was conducted before the start of the ICVB vaccination campaign  
26 and updated bi-annually. Verbal consent for participation in the surveillance was obtained and  
27 documented in a questionnaire at the time of the baseline census and at each bi-annual update. A  
28 “household” was defined as persons sharing the same cooking pot.  
29  
30  
31  
32  
33

34 In addition to the basic demographic information, household-level socioeconomic status,  
35 WASH data, and geographical locations of each household were collected during the baseline  
36 census. For households that were not present at the baseline census, WASH characteristics were  
37 assessed at the first bi-annual census update they were captured in. Household WASH  
38 characteristics were not re-assessed for new births in a household already characterized during  
39 the study period. All individuals living in the study area were provided with a study  
40 identification card containing the unique participant identification (PID) number that was  
41 recorded in computerized study databases.  
42  
43  
44  
45  
46  
47  
48  
49  
50

### 51 Disease Surveillance

52  
53 Surveillance for cholera was conducted between April 2011 to November 2015 at two  
54 icddr,b hospitals and ten hospitals serving the study area shown in Figure 1. Study surveillance  
55  
56  
57  
58  
59  
60

1  
2  
3  
4 staff were present at each health facility throughout the day to facilitate reporting of diarrheal  
5 cases from the study area. Patients from the study area were identified in the treatment centers  
6 with their study identification card or by searching their identities in on-site computerized census  
7 database. Clinical examination was carried out by physicians, and designated study staff  
8 completed data forms and obtained fecal specimens after obtaining written informed consent.  
9  
10  
11  
12

13 A diarrheal visit was defined as having 3 or more loose stools or, 1-2 or an indeterminate  
14 number of loose stools with evidence of dehydration, in the 24 hours before presentation<sup>13</sup>. If the  
15 date of discharge from an earlier diarrheal visit and the date of symptom onset for the subsequent  
16 diarrheal visit were within 7 days of one another, then both visits were considered part of the  
17 same diarrheal episode. The onset of a diarrheal episode was defined as starting on the day the  
18 patient first reported loose or liquid stools.  
19  
20  
21  
22  
23  
24

25 Fecal samples were examined for *V. cholerae* O1 or O139 serogroups, biotype, and Inaba  
26 and Ogawa serotypes using conventional methods<sup>13</sup>. A cholera episode was defined as a  
27 diarrheal episode in which a fecal specimen yielded *V. cholerae* O1 or O139, with no passage of  
28 bloody stools during the episode. Severely dehydrating cholera was defined by the presence of at  
29 least two of the following symptoms or signs of severe dehydration: sunken eyes, dry tongue,  
30 thirst, irritable condition, less active than usual along with inability to drink, skin pinch goes  
31 back slowly, and low volume of radial pulse<sup>13</sup>. A severe cholera episode was one in which the  
32 patient exhibited severe dehydration during any visit of the episode. The primary outcome in this  
33 analysis was the first severe cholera episode detected during follow-up.  
34  
35  
36  
37  
38  
39  
40  
41  
42  
43

#### 44 Patient and Public Involvement

45  
46 This analysis utilizes data that originates from the ICVB cluster randomized trial  
47 conducted by the icddr,b in 2011. Given that ten years have passed since the original study, the  
48 participants were not directly involved in developing or informing the design of the analysis  
49 described in this paper. That said, the original ICVB trial involved strong social mobilization and  
50 community engagement to improve the conduct of the study.  
51  
52  
53  
54  
55  
56  
57  
58  
59  
60

1  
2  
3  
4 The research questions addressed in the ICVB cluster randomized trial were developed  
5 due to the pressing need to understand the impact of oral cholera vaccines in urban Bangladesh.  
6  
7 Advocacy meetings with local government representatives, pediatric associations, and NGOs  
8  
9 were held in order to inform the design and conduct of the ICVB trial.  
10

## 11 12 13 **Analytical Approach**

### 14 15 *Population Under Follow-up*

16  
17 We considered a dynamic population for this analysis, which included the population  
18 present in the non-intervention arm at baseline and new entrants into the non-intervention study  
19 area during the study period. For those present at baseline, the start of follow-up was defined as  
20 the median date of first Shanchol dose in the nearest intervention cluster. For new residents, the  
21 start of follow up was defined as either the date of birth or the date of migration into the study area.  
22  
23 The end of follow-up was defined as either the end of surveillance, 4-years after baseline; date of  
24 death; date of migration out of the cluster; or onset date of first severe cholera episode, whichever  
25 came first. Person-years of observation (PYO) were calculated from the sum of follow up periods  
26 for individuals under analysis.  
27  
28  
29  
30  
31  
32  
33  
34  
35

### 36 37 *Selection of WASH variables for analyses*

38  
39 We first examined the ten household WASH variables ascertained in the demographic  
40 censuses and categorized each variable (shared toilet, drinking water source, distance to source  
41 of drinking water, drinking water treatment, toilet type, water availability, waste disposal  
42 location, hand washing water available, hand washing soap available, and shared kitchen into  
43  
44 two categories: “Better” versus “Not Better”. The categorization of WASH variables was based  
45  
46 on local context-informed judgement and the distribution of the study population into categories  
47  
48 of the WASH variables, but without prior information on cholera incidence rates associated with  
49  
50 each variable category.  
51  
52  
53

54 We randomly divided the population of clusters of the “non-intervention arm” of the trial  
55 into two subpopulations– 50% of the households into a “training” population and the other 50%  
56  
57  
58  
59



1  
2  
3  
4 into a “validation” population. The training population was used to develop a recursive  
5  
6 partitioning tree to define the composite WASH variable, and the validation population was  
7  
8 subsequently used to cross-validate the decision tree rule. We considered WASH variables  
9  
10 associated with risk of severe cholera using a Cox proportional hazard regression model at  $p$ -  
11  
12 value  $<0.2$  using the training population. We verified that each selected independent variable  
13  
14 fulfilled proportionality assumptions before inclusion into the model.  
15

### 16 17 *Construction of decision tree to develop composite WASH variable*

18  
19 We developed a composite rule for existing “Better” *versus* “Not Better” household  
20  
21 WASH through a machine learning approach, recursive partitioning, to measure the association  
22  
23 between WASH status and the incidence of severe cholera up to four years of follow-up. To  
24  
25 create a single, binary composite WASH variable predicting the occurrence of severe cholera, we  
26  
27 considered variables that were associated with severe cholera in bivariate analyses.<sup>14</sup>  
28

29 Given relatively few endpoints compared to the total number of individuals followed, we  
30  
31 accounted for the imbalanced case distribution during construction of the decision tree. The  
32  
33 decision tree was designed by assuming a 1:670 loss function for the cost of false positive and  
34  
35 false negative classification, and by defining 300 as the minimum number of observations  
36  
37 required in each terminal node. The number of cross-validations was 10. We ran the algorithm  
38  
39 with the training subpopulation and subsequently pruned the tree by the minimal complexity  
40  
41 parameter, corresponding to a minimum error with at least two terminal nodes to determine the  
42  
43 optimal decision rule for predicting severe cholera.  
44

45 With the selected tree, a receiver operating characteristic (ROC) curve was constructed  
46  
47 in the training population to find the optimal cut-off probability of the composite WASH variable  
48  
49 for predicting severe cholera<sup>15,16</sup>. This threshold was used to create a composite WASH variable  
50  
51 with two categories, one for “Better” household WASH associated with a lower probability of  
52  
53 developing severe cholera in household members, and the other for “Not Better” household  
54  
55 WASH, associated with a higher probability of developing severe cholera. We then evaluated the  
56  
57  
58  
59  
60

1  
2  
3  
4 dichotomous WASH variable in an independent validation population to confirm that the  
5 prediction rule exhibited similar sensitivity and specificity for severe cholera in both populations.  
6  
7

### 8 9 *Protective association between WASH and severe cholera*

10  
11 Next, we measured the association between “Better” WASH household status and severe  
12 cholera in the entire population residing in non-intervention clusters. To evaluate this  
13 association, we analyzed the time from start of follow-up to the first severe cholera case using  
14 the Cox proportional hazard regression model.  
15  
16

17  
18 The model was adjusted for potential confounding covariates, including age in years at  
19 start of follow-up, sex, and variables reflecting household socioeconomic status: monthly  
20 expenditure, house ownership, house having one room, and house wall constructed by  
21 brick/cement. We introduced variables into the model by mixed stepwise selection, using a  
22 combination of forward and backward selection with the cutoff  $p$ -value of 0.1 for both  
23 elimination and retention. Hazard ratios (HR) for severe cholera were estimated by  
24 exponentiating the coefficient for the composite WASH variable in models and protection was  
25 estimated as  $[(1 - HR) \times 100\%]$  with 95% confidence intervals. Estimates were also adjusted for  
26 design effect of cluster randomization of the study clusters.  
27  
28

29  
30 To determine cluster-level “Better” WASH coverage, the person-years of observation of  
31 household members living in “Better” WASH households in the cluster were divided by the  
32 person-years of the entire population in the same cluster. The association between cluster-level  
33 WASH coverage and incidence of severe cholera was assessed after adjustment for the same  
34 potential confounding variables in proportional hazard models using the same approach.  
35  
36

37  
38 Statistical analyses were performed using R Studio analytical software for decision tree  
39 modeling (rpart package), tree plotting (rpart.plot package), and ROC curve illustration (pROC  
40 package). Other statistical analyses were performed using SAS version 9.4. All  $p$ -values were  
41 two-sided.  
42  
43  
44  
45

## 46 47 48 49 50 51 52 53 54 55 **Results**

### *Training and validation subpopulations*

A total of 193,576 individuals in the non-intervention ICVB arm were included in the analysis, as shown in the CONSORT diagram in Figure 2. Of those, 80,720 individuals were present at baseline and 112,856 individuals were new entrants (107,381 in-migration individuals, 5,475 births). During the four-years of follow-up, a total of 292 severe cholera episodes were observed. The training set was composed of 96,943 individuals, 144 of whom developed severe cholera. The validation set was composed of 96,633 individuals, 148 of whom developed severe cholera. As shown in Table 1, baseline characteristics of the training and validation subpopulations were broadly comparable in terms of mean age, sex ratio, average monthly household expenditure, and other household characteristics.

### *Rule development for composite WASH variable predicting severe cholera*

A bivariate analysis for each variable in the training population was performed to measure associations of individual WASH-related variables with the risk of severe cholera (Table 2). Drinking water source (51% reduction of risk; 95% CI: -20-80), distance to source of drinking water (39% reduction of risk ; 95% CI: 14-57) and drinking water treatment (36% reduction of risk; 95% CI: 11-54) were selected to determine the composite binary WASH variable. The resulting tree, shown in Figure 3, found that treatment of drinking water was the dominant bifurcation; regardless of other WASH variables in the tree, not treating drinking water categorized the household as having “Not better” WASH.

### *Performance of the composite WASH variable predicting severe cholera*

In the training set, we found that an optimal cut-off value of 0.0012 for the composite WASH variable maximized the Youden index using the ROC curve, with an area under the curve (AUC) of 59% (95% CI: 55-63) (Figure 4). Under this threshold, the rule predicted 123 true positives of 144 severe cholera episodes, for a sensitivity of 85% (95% CI: 85-86), and 28,709 true negatives among 96,799 persons without severe cholera, yielding a specificity of 30% (95%

1  
2  
3  
4 CI: 22-37). The composite WASH variable performed similarly when applied to the validation  
5 population, with a sensitivity of 82% (95% CI: 82-82) and specificity of 30% (95% CI: 22-37).  
6  
7

### 8 9 *Prediction of severe cholera incidence by household WASH status in the total population*

10  
11 We applied the WASH prediction rule to the total population residing in the non-  
12 intervention clusters to predict severe cholera episode risk. 29.7% of households in the non-  
13 intervention arm were classified as having “Better” WASH and the remaining 70.3% were  
14 classified as having “Not Better” WASH.  
15  
16

17  
18 The incidence of severe cholera in all age groups living in the “Better” WASH  
19 households was 57 per 100,000 person-years of observation (PYO), compared to 120 per  
20 100,000 PYO in “Not Better” WASH households, a 47% (95% CI: 29-61,  $p$ -value  $<0.001$ )  
21 reduced risk of severe cholera, after adjusting for covariates. A protective association between  
22 living in a “Better” WASH households and severe cholera risk was seen in all age groups (Table  
23 3). For individuals under the age of 15, living in a “Better” WASH households was associated  
24 with having 64% (95% CI: 36-80;  $p$ -value  $<0.001$ ) reduced risk of severe cholera. The protective  
25 association of “Better” WASH household status was somewhat lower in the 15+ year age-group,  
26 where “Better” WASH was associated with a 43% (95% CI: 16-61;  $p$ -value:  $0.004$ ) reduction in  
27 severe cholera risk.  
28  
29  
30  
31  
32  
33  
34  
35  
36  
37  
38

39 There was a slight, non-significant negative association between rising proportion of  
40 “Better” WASH households in a cluster and incidence rate of severe cholera. In our model, for  
41 every ten percent increase in proportion of “Better” WASH households in a cluster, individuals  
42 living in that cluster experienced 4% lower risk of severe cholera, though this relationship was  
43 not significant (HR=0.996 (95% CI: 0.988-1.005;  $p$ -value:  $0.40$ ).  
44  
45  
46  
47  
48  
49

## 50 **Discussion**

51  
52 Using a machine learning approach, we developed a composite WASH variable  
53 characterizing households at baseline that predicted the risk of severe cholera risk for four years  
54  
55  
56  
57  
58  
59

1  
2  
3  
4 of follow-up of a cohort in a Dhaka slum. Water quality and access were the most significant  
5 factors associated with severe cholera risk.  
6

7  
8 This finding is consistent with previous literature and findings from Wolfe and  
9 colleagues' systematic review of case-control studies that found strong associations between  
10 household water quality and lowered incidence of cholera.<sup>17</sup> In this review of mostly epidemic  
11 cholera contexts, the authors found that eight WASH-related risk factors, including unimproved  
12 water source, untreated water, unsafe water storage and transport, were consistently associated  
13 with higher odds of cholera. As such, the importance of water practices in our determination of  
14 "Better" WASH is in line with the prevailing understanding of cholera risk. What is new about  
15 our findings is that the protective relationships between household WASH and cholera also  
16 pertain to cholera of life-threatening severity, are sustained for at least four years after initial  
17 characterization of household WASH at baseline, and pertain to a densely populated, poor slum  
18 in which cholera is highly endemic.  
19  
20  
21  
22  
23  
24  
25  
26  
27

28  
29 In our analysis, we found that individuals living in "Better" WASH households had 47%  
30 (95% CI: 29-61) reduced risk of severe cholera compared to individuals living in "Not Better"  
31 WASH households, after adjusting for age, gender, and socioeconomic factors. This statistically  
32 significant protective association was demonstrated in all age groups examined, though those  
33 under-15 exhibited a greater degree of protection compared to those over-15. This difference by  
34 age group may stem from the differences in WASH behaviors and exposure to cholera—wherein  
35 individuals 15 and older are more likely to have many exposures outside of the household at  
36 school, work, or play that could reduce the protective effects of living in a "Better" WASH  
37 home.  
38  
39  
40  
41  
42  
43  
44  
45

46  
47 There are several strengths to our analysis that lend credibility to the findings. The  
48 analysis was evaluated in the context of a prospective CRT in a well-defined population with  
49 comprehensive follow-up for cholera detection. We followed this population for four-years,  
50 making it one of the longest evaluations of the relationship between household WASH and  
51 severe cholera incidence, and thereby shedding light on the long-term durability of WASH  
52 adaptations. Further, during the development of the composite WASH rule we reduced bias by  
53  
54  
55  
56  
57  
58  
59  
60

1  
2  
3  
4 categorizing WASH variables without any prior knowledge of cholera incidence rate associated  
5 with each component category. We also rigorously validated the WASH prediction rule by using  
6 a validation sub-population to ensure that the rule was not over-fitted to the training sub-  
7 population.  
8  
9  
10

11 Our analysis also has limitations. Firstly, household WASH variables were only  
12 evaluated once and applied to the whole study period. As household WASH variables were more  
13 likely to have improved rather than regressed over time due to the overall secular improvement  
14 in socioeconomic conditions in Bangladesh, this misclassification, which would have affected  
15 both households classified at baseline as having “Better” WASH and those classified as having  
16 “Not Better” WASH, would be expected to have led to more conservative estimates of protective  
17 associations with baseline WASH. Secondly, it should be noted that the household WASH  
18 variables included in this study were collected in the context of an OCV trial through a brief  
19 questionnaire designed to assess confounding variables in the evaluation of vaccine  
20 effectiveness. This approach may have led to loss of information, making our estimates of the  
21 WASH-severe cholera relationship conservative, and may also have identified variables that are  
22 “proxies” for actual water-related factors that directly mediate a reduced risk of severe cholera.  
23 Consequently, the WASH variables included in the composite rule may best be interpreted as  
24 *markers* of these direct mediators. Nonetheless, because these variables predicted severe cholera  
25 risk independently of non-WASH socioeconomic factors, the analysis underscores the  
26 importance of water-related WASH adaptations in determining the risk of severe cholera in this  
27 setting. Finally, it might be queried whether the relationship between “Better WASH” in the  
28 household and a lower risk of severe cholera might reflect the possibility that the “Better  
29 WASH” households instituted home-based and clinic-based care for cholera early, and thereby  
30 forestalled progression to severe cholera. We think that this was an unlikely explanation for our  
31 findings because the study population was highly sensitized to home- and clinic-based early  
32 treatment of watery diarrhea, the population had very good access to clinics and hospitals in the  
33 proximities of their homes, and all care for diarrhea at these facilities was low cost or free of  
34 charge. Moreover, in analyses to be published elsewhere, we found that the household WASH  
35  
36  
37  
38  
39  
40  
41  
42  
43  
44  
45  
46  
47  
48  
49  
50  
51  
52  
53  
54  
55  
56  
57  
58  
59  
60

1  
2  
3  
4 prediction rule that we developed for severe cholera also strongly predicted the risk of all  
5 episodes of cholera seen at the treatment centers, regardless of severity.  
6

7 Our findings indicate that there are existing culturally acceptable WASH improvements  
8 that may be impactful in controlling severe cholera in Mirpur, a dense slum population  
9 considered to have hyperendemic cholera. Past experiences in WASH intervention programs  
10 have shown that achieving sustainable and effective WASH interventions can be challenging.  
11 For example, an evaluation of a household water treatment and handwashing campaign in rural  
12 Guatemala found that three years after the intervention there were no differences in handwashing  
13 behavior, WASH conditions, or prevalence of childhood diarrhea in the community<sup>18</sup>. Other  
14 examples of poor long-term uptake and acceptability of WASH interventions are found in  
15 programs implemented in India, Zambia, and Kenya—all highlighting the difficulty of sustained  
16 behavior adoption.<sup>19–21</sup> In light of this, understanding *existing* “Better” WASH households and  
17 behaviors in endemic slum communities can provide valuable lessons on designing feasible and  
18 sustainable WASH interventions.  
19  
20  
21  
22  
23  
24  
25  
26  
27  
28  
29

30 Recent studies have also found that Mirpur, Bangladesh, the site for this study, has very  
31 high rates of microbiological proliferation and contamination in the municipal water supply,<sup>22</sup>  
32 likely due to antiquated and now porous water and sewage pipes, making achievable WASH  
33 improvements paramount to improving community health. Our analysis found that there *are*  
34 existing household water adaptations in Mirpur associated with significantly lowered severe  
35 cholera risk, despite contaminated municipal water. The fact that the WASH adaptations  
36 practiced by 30% of the population were significantly predictive of lower severe cholera risk  
37 even within slum conditions speaks to the potential for existing knowledge to inform cholera  
38 control strategies.  
39  
40  
41  
42  
43  
44  
45  
46  
47

48 Cholera transmission in urban slums may only intensify with the pressures of rapid  
49 urbanization combined with climate change effects. Endemic cholera in urban areas is a reality in  
50 Bangladesh that faces challenges that are different from previously studied epidemic and rural  
51 cholera transmission. Closely examining how some urban households have already made WASH  
52  
53  
54  
55  
56  
57  
58  
59  
60

1  
2  
3 adaptations to reduce cholera risk may help design effective cholera control programs that are  
4 sustainable and achievable in similar settings.  
5  
6  
7

### 8 9 **Data Availability Statement**

10 Data are currently available upon reasonable request and will soon be made available in a public,  
11 open access data repository.  
12  
13  
14

### 15 16 **Ethics Statement**

17 This study is a re-analysis of data from a cluster randomized trial entitled 'Introduction of  
18 cholera vaccine in Bangladesh (ICVB)' conducted by the icddr,b in 2011. The ICVB trial  
19 received Institutional Review Board approval (icddr,b protocol number PR#17124) and  
20 Bangladesh National Research Ethics Committee approval. Participants gave informed consent  
21 to participate in the study before taking part.  
22  
23  
24  
25  
26

### 27 28 **Author Contributions**

29 JDC conceptualized the study. SK and FC prepared the original draft. Data analysis was carried  
30 out by JP, FA, and DRK. Additionally, JDC, FQ, FM, JHK, and AIK supervised the study. TA,  
31 BTT, TI, JI, ABA, MH, GD, FK, XL, and KZ participated in interpreting the data. All authors  
32 reviewed and approved the final manuscript.  
33  
34  
35  
36

### 37 38 **Competing Interests**

39 There are no competing interests from any of the authors.  
40  
41  
42

### 43 44 **Funding**

45 This work was supported, in whole or in part, by the Bill & Melinda Gates Foundation [INV  
46 025386]. Under the grant conditions of the Foundation, a Creative Commons Attribution 4.0  
47 Generic License has already been assigned to the Author Accepted Manuscript version that  
48 might arise from this submission.  
49  
50  
51

### 52 53 **Acknowledgement**

54  
55  
56  
57  
58  
59  
60



1  
2  
3  
4 Icdrr,b is grateful to the Governments of Bangladesh, Canada, Sweden and the UK for providing  
5 unrestricted support. Thanks to Dr. Nigel McMillan (Griffith University) for his scientific and  
6 technical support in the manuscript. The funders had no role in study design, data collection and  
7 analysis, decision to publish, or preparation of the manuscript.  
8  
9  
10  
11  
12  
13  
14  
15  
16  
17  
18  
19  
20  
21  
22  
23  
24  
25  
26  
27  
28  
29

### 30 31 References

- 32 1. Ritchie, H. & Roser, M. Urbanization. *Our World Data* (2018).  
33  
34
- 35 2. Dhaka: fastest growing megacity in the world. *The World from PRX*  
36  
37 [38 https://www.pri.org/stories/2010-09-08/dhaka-fastest-growing-megacity-world.](https://www.pri.org/stories/2010-09-08/dhaka-fastest-growing-megacity-world)  
39  
40  
41
- 42 3. Ross, A. G. P., Zaman, K. & Clemens, J. D. Health Concerns in Urban Slums: A Glimpse of  
43  
44 Things to Come? *JAMA* **321**, 1973–1974 (2019).  
45  
46  
47  
48
- 49 4. Islam, M. T., Clemens, J. D. & Qadri, F. Cholera Control and Prevention in Bangladesh: An  
50  
51 Evaluation of the Situation and Solutions. *J. Infect. Dis.* **218**, S171–S172 (2018).  
52  
53  
54  
55  
56  
57  
58  
59  
60

- 1  
2  
3  
4 5. Longini, I. M., Jr. *et al.* Epidemic and Endemic Cholera Trends over a 33-Year Period in  
5  
6  
7 Bangladesh. *J. Infect. Dis.* **186**, 246–251 (2002).  
8  
9
- 10  
11 6. Asadgol, Z. *et al.* How climate change can affect cholera incidence and prevalence? A  
12  
13 systematic review. *Environ. Sci. Pollut. Res.* **27**, 34906–34926 (2020).  
14  
15
- 16  
17 7. Salerno, F., Gaetano, V. & Gianni, T. Urbanization and climate change impacts on surface  
18  
19 water quality: Enhancing the resilience by reducing impervious surfaces. *Water Res.* **144**,  
20  
21 491–502 (2018).  
22  
23  
24
- 25  
26  
27 8. Kumar, M., Deka, J. P. & Kumari, O. Development of Water Resilience Strategies in the  
28  
29 context of climate change, and rapid urbanization: A discussion on vulnerability mitigation.  
30  
31  
32  
33  
34 *Groundw. Sustain. Dev.* **10**, 100308 (2020).  
35  
36
- 37  
38 9. Taylor, D. L., Kahawita, T. M., Cairncross, S. & Ensink, J. H. J. The Impact of Water,  
39  
40 Sanitation and Hygiene Interventions to Control Cholera: A Systematic Review. *PLOS ONE*  
41  
42  
43  
44 **10**, e0135676 (2015).  
45  
46
- 47  
48 10. George, C. M. *et al.* Randomized Controlled Trial of Hospital-Based Hygiene and Water  
49  
50 Treatment Intervention (CHoBI7) to Reduce Cholera. *Emerg. Infect. Dis.* **22**, 233–241  
51  
52  
53  
54 (2016).  
55  
56  
57  
58  
59  
60

- 1  
2  
3  
4 11. Luby, S. P., Davis, J., Brown, R. R., Gorelick, S. M. & Wong, T. H. F. Broad approaches to  
5  
6 cholera control in Asia: Water, sanitation and handwashing. *Vaccine* **38 Suppl 1**, A110–  
7  
8 A117 (2020).  
9  
10  
11  
12  
13 12. Childs, L. *et al.* Evaluation of Knowledge and Practices Regarding Cholera, Water  
14  
15 Treatment, Hygiene, and Sanitation Before and After an Oral Cholera Vaccination  
16  
17 Campaign-Haiti, 2013-2014. *Am. J. Trop. Med. Hyg.* **95**, 1305–1313 (2016).  
18  
19  
20  
21  
22 13. Qadri, F. *et al.* Feasibility and effectiveness of oral cholera vaccine in an urban endemic  
23  
24 setting in Bangladesh: a cluster randomised open-label trial. *The Lancet* **386**, 1362–1371  
25  
26 (2015).  
27  
28  
29  
30  
31  
32  
33 14. Strobl, C., Malley, J. & Tutz, G. An Introduction to Recursive Partitioning: Rationale,  
34  
35 Application and Characteristics of Classification and Regression Trees, Bagging and  
36  
37 Random Forests. *Psychol. Methods* **14**, 323–348 (2009).  
38  
39  
40  
41  
42  
43 15. Hand, D. J. Measuring classifier performance: a coherent alternative to the area under the  
44  
45 ROC curve. *Mach. Learn.* **77**, 103–123 (2009).  
46  
47  
48  
49  
50 16. Faraggi, D. & Reiser, B. Estimation of the area under the ROC curve. *Stat. Med.* **21**, 3093–  
51  
52 3106 (2002).  
53  
54  
55  
56  
57  
58  
59  
60

- 1  
2  
3  
4 17. Wolfe, M., Kaur, M., Yates, T., Woodin, M. & Lantagne, D. A Systematic Review and  
5  
6  
7 Meta-Analysis of the Association between Water, Sanitation, and Hygiene Exposures and  
8  
9  
10 Cholera in Case–Control Studies. *Am. J. Trop. Med. Hyg.* **99**, 534–545 (2018).  
11  
12  
13  
14 18. Arnold, B., Arana, B., Mäusezahl, D., Hubbard, A. & Colford, J. M., Jr. Evaluation of a pre-  
15  
16  
17 existing, 3-year household water treatment and handwashing intervention in rural Guatemala.  
18  
19  
20 *Int. J. Epidemiol.* **38**, 1651–1661 (2009).  
21  
22  
23  
24 19. Makutsa, P. *et al.* Challenges in Implementing a Point-of-Use Water Quality Intervention in  
25  
26  
27 Rural Kenya. *Am. J. Public Health* **91**, 1571–1573 (2001).  
28  
29  
30  
31 20. Firth, J. *et al.* Point-of-Use Interventions to Decrease Contamination of Drinking Water: A  
32  
33  
34 Randomized, Controlled Pilot Study on Efficacy, Effectiveness, and Acceptability of Closed  
35  
36  
37 Containers, *Moringa oleifera*, and In-home Chlorination in Rural South India. *Am. J. Trop.*  
38  
39  
40 *Med. Hyg.* **82**, 759–765 (2010).  
41  
42  
43  
44 21. Peletz, R. *et al.* Follow-Up Study to Assess the Use and Performance of Household Filters in  
45  
46  
47 Zambia. *Am. J. Trop. Med. Hyg.* **89**, 1190–1194 (2013).  
48  
49  
50  
51  
52  
53  
54  
55  
56  
57  
58  
59  
60

- 1  
2  
3  
4 22. Acharjee, M., Rahman, F., Jahan, F. & Noor, R. Bacterial Proliferation in Municipal Water  
5  
6  
7 Supplied in Mirpur Locality of Dhaka City, Bangladesh: Microbiological Study of Municipal  
8  
9  
10 Water. *CLEAN - Soil Air Water* **42**, 434–441 (2014).  
11  
12  
13  
14  
15  
16  
17  
18  
19  
20  
21  
22  
23  
24  
25  
26  
27  
28  
29  
30  
31  
32  
33  
34  
35  
36  
37  
38  
39  
40  
41  
42  
43  
44  
45  
46  
47  
48  
49  
50  
51  
52  
53  
54  
55  
56  
57  
58  
59  
60

## Figure Legends

Figure 1. Map of ICVB study area and cholera surveillance treatment centers

Figure 2. CONSORT- Dynamic population during 4-year follow up period

Figure 3. Decision rule predicting severe cholera episode risk in the training subpopulation

Figure 4. ROC curve for the performance of the decision rule in the training subpopulation

**Table 1. Baseline characteristics of the total, training, and validation subpopulations**

|                                               | Total Population | Training sub-population | Validation sub-population |
|-----------------------------------------------|------------------|-------------------------|---------------------------|
|                                               | n=193576         | n=96943                 | n=96633                   |
| Age in years - mean (std)                     | 22.9 (15.4)      | 22.9 (15.3)             | 22.9 (15.4)               |
| Gender: Male - n (%)                          | 94008 (48.6)     | 47365 (48.9)            | 46643 (48.3)              |
| Monthly Expenditure <sup>†</sup> – mean (std) | 10288.6 (5374.1) | 10293.1 (4891.7)        | 10284.1 (5817.7)          |
| Ownership: Own house - n (%)                  | 28677 (14.8)     | 14549 (15.0)            | 14128 (14.6)              |
| House: having one room - n (%)                | 165215 (85.3)    | 82427 (85.0)            | 82788 (85.7)              |
| Wall: Brick/Cement - n (%)                    | 139860 (72.3)    | 69880 (72.1)            | 69980 (72.4)              |

\* std: standard deviation; n: number of individuals

<sup>†</sup> expenditure in Bangladeshi takas (BDT)

**Table 2: Bivariate relationship of WASH variables with severe cholera risk in the training subpopulation**

| WASH Variable<br><i>Criteria for Better WASH categorization</i>                         | Better WASH |       |              |                           | Not Better WASH |       |              |                           | Protective association between variable and severe cholera |         |
|-----------------------------------------------------------------------------------------|-------------|-------|--------------|---------------------------|-----------------|-------|--------------|---------------------------|------------------------------------------------------------|---------|
|                                                                                         | n           | Cases | Person-years | IR (95% CI) Per 100000/PY | n               | Cases | Person-years | IR (95% CI) Per 100000/PY | Crude (95%CI)                                              | P-value |
| <b>Shared toilet</b><br><i>No</i>                                                       | 4620        | 9     | 10253        | 88 (46, 169)              | 92323           | 135   | 134076       | 101 (85, 119)             | 21 (-55, 60)                                               | 0.49    |
| <b>Toilet type</b><br><i>Sanitary latrine with or without flush</i>                     | 80974       | 122   | 118747       | 103 (86, 123)             | 15969           | 22    | 25582        | 86 (57, 131)              | -24 (-95, 21)                                              | 0.36    |
| <b>Drinking Water Source:</b><br><i>Own tap/well/pump/bottled or vendor water</i>       | 4187        | 5     | 8993         | 56 (23, 134)              | 92756           | 139   | 135337       | 103 (87, 121)             | 51 (-20, 80)                                               | 0.12    |
| <b>Water availability:</b><br><i>Tap/tube well/well water is available all the time</i> | 67831       | 95    | 93293        | 102 (83, 125)             | 29112           | 49    | 51036        | 96 (73, 127)              | -15 (-64, 19)                                              | 0.43    |
| <b>Distance to source of drinking water</b><br><i>Using median as cut off</i>           | 43806       | 47    | 64461        | 73 (55, 97)               | 53137           | 97    | 79869        | 121 (100, 148)            | 39 (14, 57)                                                | <0.01   |

|                                                                             |       |     |        |               |       |    |       |                |                |       |
|-----------------------------------------------------------------------------|-------|-----|--------|---------------|-------|----|-------|----------------|----------------|-------|
| <b>Drinking Water Treatment:</b><br><i>Filtered/Boiled/chemical treated</i> | 54275 | 60  | 77380  | 78 (60, 100)  | 42668 | 84 | 66950 | 125 (101, 155) | 36 (11, 54)    | <0.01 |
| <b>Waste disposal location:</b> <i>Fixed</i>                                | 80198 | 109 | 116056 | 94 (78, 113)  | 16745 | 35 | 28273 | 124 (89, 172)  | 20 (-17, 46)   | 0.25  |
| <b>Hand Washing Water Available</b> §<br><i>Yes</i>                         | 93758 | 138 | 138159 | 100 (85, 118) | 3185  | 6  | 6170  | 97 (44, 216)   | -11 (-152, 51) | 0.8   |
| <b>Hand Washing Soap Available</b> §<br><i>Yes</i>                          | 91514 | 133 | 135316 | 98 (83, 117)  | 5429  | 11 | 9014  | 122 (68, 220)  | 17 (-54, 55)   | 0.56  |
| <b>Shared kitchen</b><br><i>No</i>                                          | 86713 | 118 | 120182 | 98 (82, 118)  | 10230 | 26 | 24147 | 108 (73, 158)  | -5 (-62, 32)   | 0.83  |

\* IR: incidence rate; n: number of individuals

§ Indicates WASH condition observed directly by study team

**Table 3. Protective association between “Better” WASH and severe cholera risk in the total study population**

| Age at start of follow-up | “Better” WASH |       |              |                            | “Not Better” WASH |       |              |                            | Protective association between “Better” WASH and severe cholera |         |                   |         |
|---------------------------|---------------|-------|--------------|----------------------------|-------------------|-------|--------------|----------------------------|-----------------------------------------------------------------|---------|-------------------|---------|
|                           | n             | Cases | Person-years | IR per 100000/PYs (95% CI) | N                 | Cases | Person-years | IR per 100000/PYs (95% CI) | Crude (95%CI)                                                   | p-value | Adjusted* (95%CI) | p-value |
| < 5 years                 | 7552          | 5     | 10518        | 48 (20, 114)               | 17149             | 42    | 24366        | 172 (127, 233)             | 72 (25, 89)                                                     | 0.012   | 69 (15, 88)       | 0.022   |
| 5-14 years                | 8861          | 4     | 14618        | 27 (10, 73)                | 25318             | 32    | 42389        | 75 (53, 107)               | 63 (6, 85)                                                      | 0.037   | 63 (6, 85)        | 0.037   |
| 15+ years                 | 40983         | 39    | 59680        | 65 (48, 89)                | 93713             | 170   | 136945       | 124 (107, 144)             | 46 (20, 64)                                                     | 0.002   | 43 (16, 61)       | 0.004   |
| All                       | 57396         | 48    | 84817        | 57 (43, 75)                | 136180            | 244   | 203701       | 120 (106, 136)             | 52 (34, 65)                                                     | <0.001  | 47 (29, 61)       | <0.001  |

\* IR: incidence rate; n: number of individuals

\* Adjusted for design effect and selected covariates by stepwise selection using cutoff 0.1 for both of elimination and addition; For entire population, selected covariates were age, gender, home ownership and house having one room; For <5 years, selected covariate was home ownership; For 5-14 years, no covariate was selected; For 15+ years, selected covariates were age, gender and house having one room

1  
2  
3  
4  
5  
6  
7  
8  
9  
10  
11  
12  
13  
14  
15  
16  
17  
18  
19  
20  
21  
22  
23  
24  
25  
26  
27  
28  
29  
30  
31  
32  
33  
34  
35  
36  
37  
38  
39  
40  
41  
42  
43  
44  
45  
46  
47  
48  
49  
50  
51  
52  
53  
54  
55  
56  
57  
58  
59  
60



Figure 1. Map of ICVB study area and cholera surveillance treatment centers

221x177mm (237 x 211 DPI)





36  
37  
38  
39  
40  
41  
42  
43  
44  
45  
46  
47  
48  
49  
50  
51  
52  
53  
54  
55  
56  
57  
58  
59  
60

Figure 2: CONSORT- Dynamic population during 4-year follow-up period

109x102mm (300 x 300 DPI)

1  
2  
3  
4  
5  
6  
7  
8  
9  
10  
11  
12  
13  
14  
15  
16  
17  
18  
19  
20  
21  
22  
23  
24  
25  
26  
27  
28  
29  
30  
31  
32  
33  
34  
35  
36  
37  
38  
39  
40  
41  
42  
43  
44  
45  
46  
47  
48  
49  
50  
51  
52  
53  
54  
55  
56  
57  
58  
59  
60

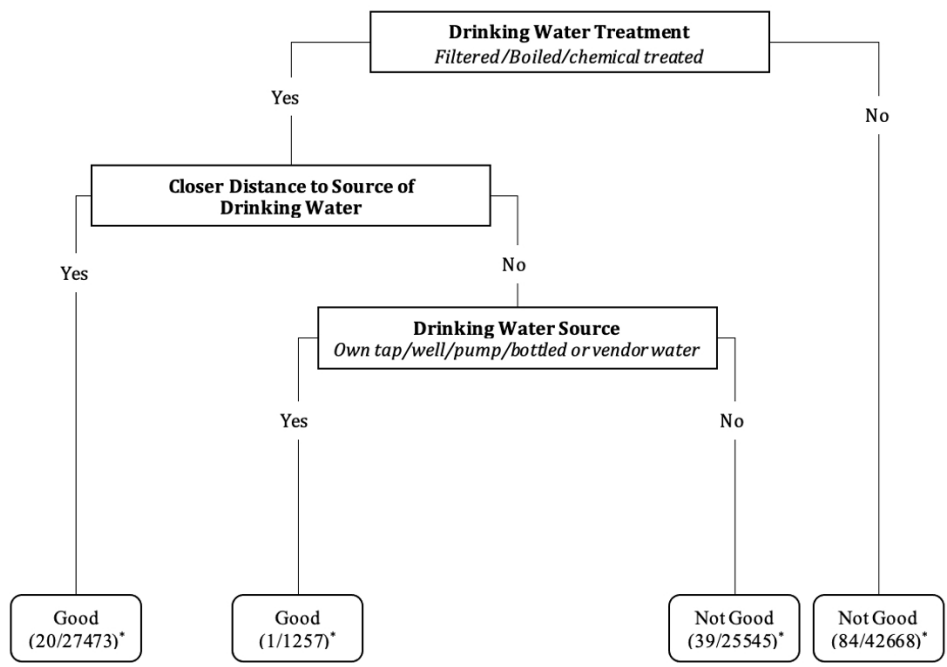

\* Number of severe cholera cases / household population in the training subpopulation

Figure 3. Decision rule predicting severe cholera episode risk in the training subpopulation

202x156mm (144 x 144 DPI)

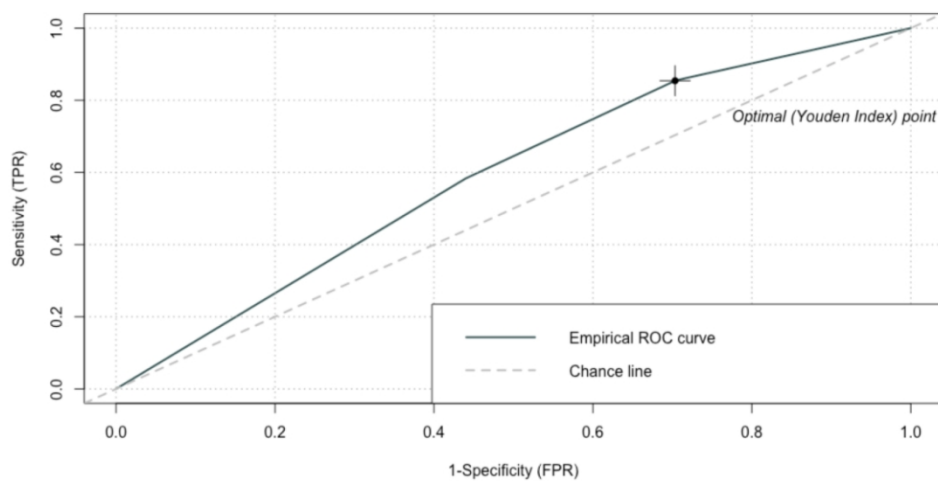

AUC = 59% (95% CI, 55-63); optimal cut-off probability using the Youden index = 0.0012

Figure 4. ROC curve for the performance of the decision rule in the training subpopulation

209x116mm (144 x 144 DPI)

STROBE Statement—Checklist of items that should be included in reports of *cohort studies*

|                           | Item No | Recommendation                                                                                                                                                                                                                                                                                                         | Page No                       |
|---------------------------|---------|------------------------------------------------------------------------------------------------------------------------------------------------------------------------------------------------------------------------------------------------------------------------------------------------------------------------|-------------------------------|
| <b>Title and abstract</b> | 1       | (a) Indicate the study's design with a commonly used term in the title or the abstract                                                                                                                                                                                                                                 | 1                             |
|                           |         | (b) Provide in the abstract an informative and balanced summary of what was done and what was found                                                                                                                                                                                                                    | 2                             |
| <b>Introduction</b>       |         |                                                                                                                                                                                                                                                                                                                        |                               |
| Background/rationale      | 2       | Explain the scientific background and rationale for the investigation being reported                                                                                                                                                                                                                                   | 4                             |
| Objectives                | 3       | State specific objectives, including any prespecified hypotheses                                                                                                                                                                                                                                                       | 4                             |
| <b>Methods</b>            |         |                                                                                                                                                                                                                                                                                                                        |                               |
| Study design              | 4       | Present key elements of study design early in the paper                                                                                                                                                                                                                                                                | 1-2                           |
| Setting                   | 5       | Describe the setting, locations, and relevant dates, including periods of recruitment, exposure, follow-up, and data collection                                                                                                                                                                                        | 2, 4-5                        |
| Participants              | 6       | (a) Give the eligibility criteria, and the sources and methods of selection of participants. Describe methods of follow-up<br>(b) For matched studies, give matching criteria and number of exposed and unexposed                                                                                                      | 5-6<br>N/A                    |
| Variables                 | 7       | Clearly define all outcomes, exposures, predictors, potential confounders, and effect modifiers. Give diagnostic criteria, if applicable                                                                                                                                                                               | 5-6                           |
| Data sources/measurement  | 8*      | For each variable of interest, give sources of data and details of methods of assessment (measurement). Describe comparability of assessment methods if there is more than one group                                                                                                                                   | 5-7                           |
| Bias                      | 9       | Describe any efforts to address potential sources of bias                                                                                                                                                                                                                                                              | 6-7                           |
| Study size                | 10      | Explain how the study size was arrived at                                                                                                                                                                                                                                                                              | N/A                           |
| Quantitative variables    | 11      | Explain how quantitative variables were handled in the analyses. If applicable, describe which groupings were chosen and why                                                                                                                                                                                           | 6-7                           |
| Statistical methods       | 12      | (a) Describe all statistical methods, including those used to control for confounding<br>(b) Describe any methods used to examine subgroups and interactions<br>(c) Explain how missing data were addressed<br>(d) If applicable, explain how loss to follow-up was addressed<br>(e) Describe any sensitivity analyses | 6-8<br>6-8<br>N/A<br>6<br>N/A |
| <b>Results</b>            |         |                                                                                                                                                                                                                                                                                                                        |                               |
| Participants              | 13*     | (a) Report numbers of individuals at each stage of study—eg numbers potentially eligible, examined for eligibility, confirmed eligible, included in the study, completing follow-up, and analysed<br>(b) Give reasons for non-participation at each stage<br>(c) Consider use of a flow diagram                        | 8<br>N/A<br>12                |
| Descriptive data          | 14*     | (a) Give characteristics of study participants (eg demographic, clinical, social) and information on exposures and potential confounders<br>(b) Indicate number of participants with missing data for each variable of interest<br>(c) Summarise follow-up time (eg, average and total amount)                         | 13<br>N/A<br>8                |
| Outcome data              | 15*     | Report numbers of outcome events or summary measures over time                                                                                                                                                                                                                                                         | 8                             |

|    |                          |    |                                                                                                                                                                                                              |       |
|----|--------------------------|----|--------------------------------------------------------------------------------------------------------------------------------------------------------------------------------------------------------------|-------|
| 1  | Main results             | 16 | (a) Give unadjusted estimates and, if applicable, confounder-adjusted estimates and their precision (eg, 95% confidence interval). Make clear which confounders were adjusted for and why they were included | 9     |
| 2  |                          |    | (b) Report category boundaries when continuous variables were categorized                                                                                                                                    | N/A   |
| 3  |                          |    | (c) If relevant, consider translating estimates of relative risk into absolute risk for a meaningful time period                                                                                             | N/A   |
| 4  |                          |    |                                                                                                                                                                                                              |       |
| 5  |                          |    |                                                                                                                                                                                                              |       |
| 6  |                          |    |                                                                                                                                                                                                              |       |
| 7  |                          |    |                                                                                                                                                                                                              |       |
| 8  |                          |    |                                                                                                                                                                                                              |       |
| 9  | Other analyses           | 17 | Report other analyses done—eg analyses of subgroups and interactions, and sensitivity analyses                                                                                                               | 11    |
| 10 |                          |    |                                                                                                                                                                                                              |       |
| 11 | <b>Discussion</b>        |    |                                                                                                                                                                                                              |       |
| 12 |                          |    |                                                                                                                                                                                                              |       |
| 13 | Key results              | 18 | Summarise key results with reference to study objectives                                                                                                                                                     | 10    |
| 14 | Limitations              | 19 | Discuss limitations of the study, taking into account sources of potential bias or imprecision. Discuss both direction and magnitude of any potential bias                                                   | 12    |
| 15 |                          |    |                                                                                                                                                                                                              |       |
| 16 | Interpretation           | 20 | Give a cautious overall interpretation of results considering objectives, limitations, multiplicity of analyses, results from similar studies, and other relevant evidence                                   | 11-13 |
| 17 |                          |    |                                                                                                                                                                                                              |       |
| 18 | Generalisability         | 21 | Discuss the generalisability (external validity) of the study results                                                                                                                                        | 12-13 |
| 19 |                          |    |                                                                                                                                                                                                              |       |
| 20 |                          |    |                                                                                                                                                                                                              |       |
| 21 | <b>Other information</b> |    |                                                                                                                                                                                                              |       |
| 22 |                          |    |                                                                                                                                                                                                              |       |
| 23 | Funding                  | 22 | Give the source of funding and the role of the funders for the present study and, if applicable, for the original study on which the present article is based                                                | 13    |
| 24 |                          |    |                                                                                                                                                                                                              |       |

\*Give information separately for exposed and unexposed groups.

**Note:** An Explanation and Elaboration article discusses each checklist item and gives methodological background and published examples of transparent reporting. The STROBE checklist is best used in conjunction with this article (freely available on the Web sites of PLoS Medicine at <http://www.plosmedicine.org/>, Annals of Internal Medicine at <http://www.annals.org/>, and Epidemiology at <http://www.epidem.com/>). Information on the STROBE Initiative is available at <http://www.strobe-statement.org>.
